# Supplementary material for: Studies of cyanomethylcarbamoyl-bridged anthracene and pyrene fluorophores
Source: Royal Society of Chemistry journal article supplement (doi:10.1039/d1nj03044b), 2021-01-01
Supplement: d1nj03044b1.pdf [file d1nj03044b1.pdf]

*Supporting Information for*

# **Studies of cyanomethylcarbamoyl-bridged anthracene and pyrene fluorophores**

Eyad A. Younes, <sup>\*a</sup> Maram J. Issa, <sup>a</sup> Maryam F. Abdollahi, <sup>b</sup>, Yuan-Fu Ding, <sup>c</sup> Anas J. Rasras, <sup>d</sup>  
Greta S. P. Mok, <sup>c</sup> Jian-Bin Lin<sup>e</sup>, and Yuming Zhao<sup>\*b</sup>

<sup>a</sup>Department of Chemistry, Faculty of science, The Hashemite University, P.O. Box 330127, Zarqa 13133, Jordan. Tel: +962 (5) 3903333 ext. 4572; E-mail: [e.younes@hu.edu.jo](mailto:e.younes@hu.edu.jo)

<sup>b</sup>Department of Chemistry, Memorial University of Newfoundland, St. John's, NL, Canada A1B 3X7. Fax: 1 709 864 3702; Tel: 1 709 864 8747; Email: [yuming@mun.ca](mailto:yuming@mun.ca)

<sup>c</sup>Biomedical Imaging Laboratory (BIG), Department of Electrical and Computer Engineering, University of Macau, Taipa, Macau, China

<sup>d</sup>Department of Chemistry, Faculty of Science, Al-Balqa Applied University, Al-Salt, Jordan

<sup>e</sup>C-CART, CREAT Network, Memorial University of Newfoundland, St. John's, Newfoundland and Labrador, Canada

## **Table of Content**

|                                                                           |      |
|---------------------------------------------------------------------------|------|
| 1. Synthetic Procedures for Compounds <b>2-3</b>                          | S-2  |
| 2. NMR Spectra of Compounds <b>2-3</b>                                    | S-4  |
| 3. UV-Vis Titrations of Compounds <b>2-3</b> with TBAF                    | S-12 |
| 4. <sup>1</sup> H NMR Titrations of Compounds <b>2a</b> with TBAF         | S-15 |
| 5. High-Resolution Mass Spectra for Compounds <b>2-3</b>                  | S-18 |
| 6. Concentration-Dependent Fluorescence Behavior of <b>2</b> and <b>3</b> | S-22 |
| 7. Detailed Results of DFT and TD-DFT Calculations                        | S-26 |
| 8. Crystallographic Data and Detailed Refinements for <b>2-3</b>          | S-35 |

## 1. Synthetic Procedures for Compounds 2-3

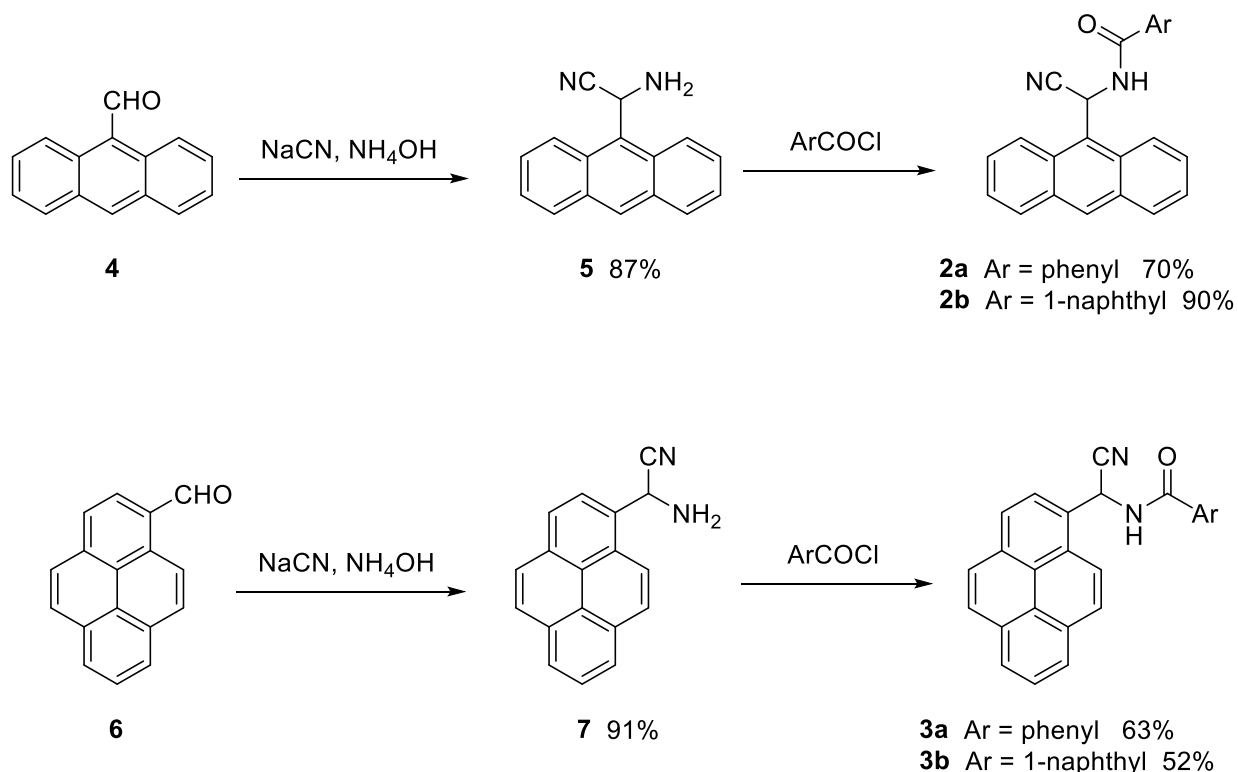

**Scheme S-1** Stepwise synthetic procedures for compounds 2-3.

### General Procedure for the synthesis of $\alpha$ -aminonitriles **5** and **7**

$\alpha$ -Aminonitriles **5** and **7** were prepared according to the literature procedure.<sup>1</sup> A cooled mixture of the corresponding aldehyde (1.0 mmol) in ammonium hydroxide (20 mL) and ethanol (10 mL) was stirred for 10 min. Sodium cyanide (NaCN) (0.050 g, 1.0 mmol) was added in small portions. Ammonium chloride (0.053 g, 1.0 mmol) was then added to the solution. The flask was securely stoppered and left under continuous stirring for 24 h at rt. The resulting product was extracted with chloroform (2  $\times$  15 mL). The organic layers were combined and dried over anhydrous MgSO<sub>4</sub>. The organic solvent was removed under reduced pressure to give  $\alpha$ -aminonitriles as a solid.

**2-Amino-2-(anthracen-9-yl)acetonitrile (5).** 9-Anthracenecarboxaldehyde (0.21 g, 1.0 mmol) was reacted according to the general procedure, yielding compound **5** (0.18 g, 87%) as an orange solid. m.p. 143-145 °C; <sup>1</sup>H NMR (400 MHz, CDCl<sub>3</sub>):  $\delta$  8.57 (1 H, s), 8.50 (2 H, d, *J* = 9.0), 8.10

<sup>1</sup> Younes, E. A.; Hussein, N.; Shtaiwi, M.; Shahrokhi, F.; Safieh, K. A. A.; Zhao, Y. N-(Cyano(naphthalen-1-yl)methyl)benzamides: Synthesis, Crystal Structures, and Colorimetric Sensing of Fluoride Anions. *New J. Chem.* **2020**, *44*, 16546-16556.

(2 H, d,  $J = 8.5$ ), 7.68 (2 H, ddd,  $J = 9.0, 6.6, 1.4$ ), 7.60 -7.53 (2 H, m), 6.41 (1 H, s), 3.75 (1 H, q,  $J = 7.0$ ), 2.31 (1 H, s) ppm;  $^{13}\text{C}$  NMR (101 MHz,  $\text{CDCl}_3$ ):  $\delta$  131.63, 130.06, 129.81, 128.92, 127.46, 125.32, 122.94, 121.41, 40.93 ppm; HRMS (APPI-TOF, negative mode)  $m/z$  calcd. for  $\text{C}_{16}\text{H}_{12}\text{N}_2$  232.1000; found 232.0999  $[\text{M}]^+$ .

**2-Amino-2-(pyren-1-yl)acetonitrile (7).** 1-Pyrenecarboxaldehyde (0.23g, 1.0 mmol) was reacted according to the general procedure, yielding compound **7** (0.21g, 91% ) as yellow solid. m.p. 116-119 °C;  $^1\text{H}$  NMR (400 MHz,  $\text{DMSO}-d_6$ ):  $\delta$  8.51 (1 H, d,  $J = 9.3$ ), 8.43- 8.27 (5 H, m), 8.28- 8.18 (2 H, m), 8.13 (1 H, t,  $J = 7.6$ ), 6.09 (1 H, s), 3.13 (2 H, d,  $J = 7.2$ ) ppm;  $^{13}\text{C}$  NMR (101 MHz,  $\text{DMSO}-d_6$ ):  $\delta$  131.78, 131.37, 131.22, 130.61, 128.49, 128.25, 127.83, 127.76, 127.00, 126.19, 126.05, 125.41, 125.32, 124.55, 124.21, 123.36, 122.87, 44.70 ppm; HRMS (APPI-TOF, positive mode)  $m/z$  calcd. for  $\text{C}_{18}\text{H}_{14}\text{N}_2$  256.1000; found 256.0994  $[\text{M}]^+$ .

### General procedure for acylation reaction

To a solution of (1.0 mmol) acyl chloride in dry THF (15 mL) at 0 °C were added  $\alpha$ -aminonitrile (1.0 mmol) and then triethylamine (1.0 mL). The resulting mixture was allowed to be slowly warmed up to room temperature and stirred for 3 h. The white precipitate of triethylammonium chloride was then removed by suction filtration. The solution was subjected to evaporation under reduced pressure, and the resulting crude solid product was purified by recrystallization from ethanol/water to afford pure acylated product.

***N*-(anthracen-9-yl(cyano)methyl)benzamide (2a).** Benzoyl chloride (0.14 g, 1.0mmol) and 2-amino-2-(anthracen-9-yl)acetonitrile (**5**) (0.23g, 1.0 mmol) were reacted according to the general procedures, yielding compound **2a** (0.10g, 70%) as an orange solid.

***N*-(anthracen-9-yl(cyano)methyl)-2-naphthamide (2b).** 1-Naphthoyl chloride (0.19 g, 1.0mmol) and 2-amino-2-(anthracen-9-yl)acetonitrile (**5**) (0.23 g, 1.0 mmol) were reacted according to the general procedures, yielding compound **2b** (0.42g , 90%) as an white solid.

***N*-(cyano(pyren-1-yl)methyl)benzamide (3a).** Benzoyl chloride (0.14 g, 1.0 mmol) and 2-amino-2-(pyren-1-yl)acetonitrile (**7**) (0.26g, 1.0 mmol) were reacted according to the general procedures, yielding compound **3a** (0.24 , 63%) as a pale yellow solid.

***N*-(cyano(pyren-1-yl)methyl)-2-naphthamide (3b).** 1-Naphthoyl chloride (0.19 g, 1.0 mmol) and 2-amino-2-(pyren-1-yl)acetonitrile (**7**) (0.26g, 1.0 mmol) were reacted according to the general procedures, yielding compound **3b** (0.13 g , 52%) as a white solid.

## 2. NMR Spectra of Compounds 2-3

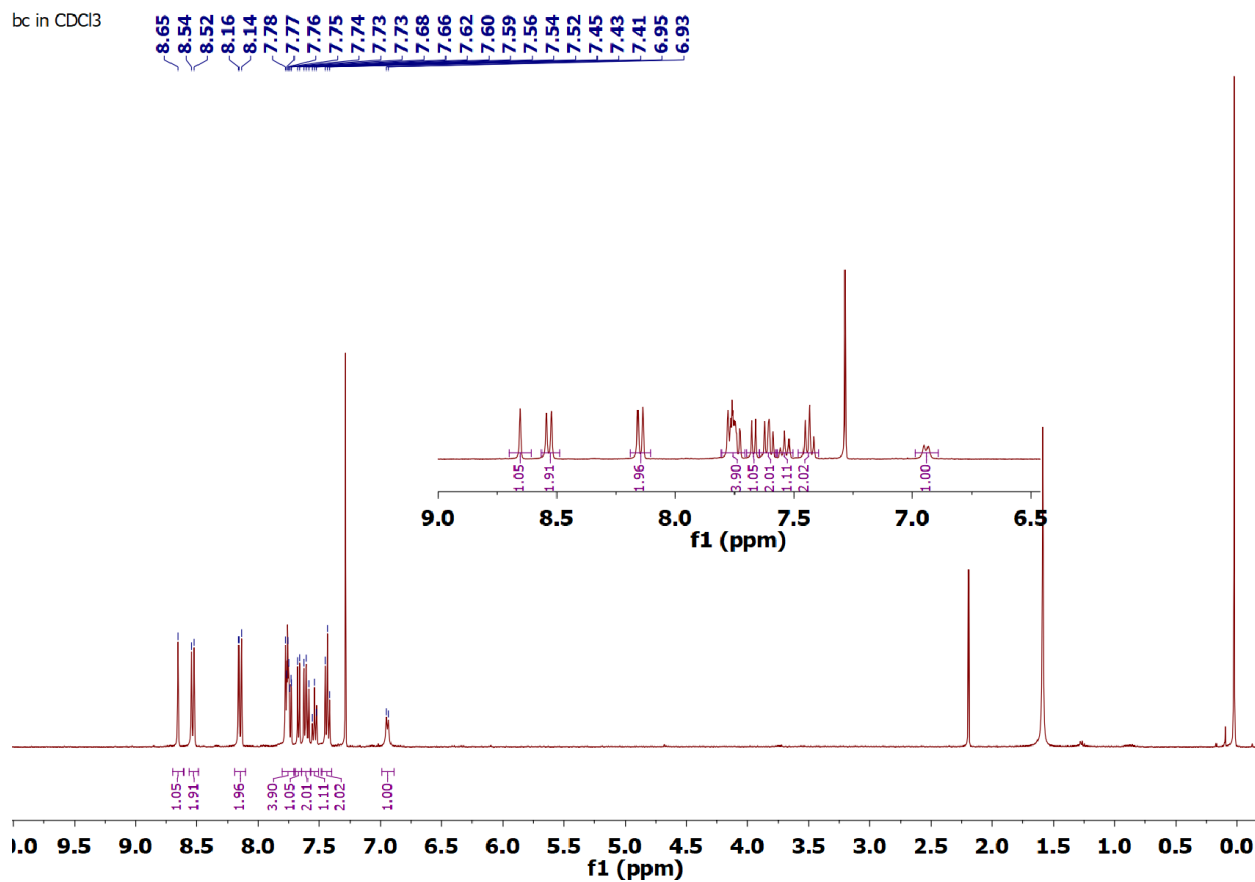

Fig. S-1 <sup>1</sup>H NMR (400 MHz, CDCl<sub>3</sub>) spectrum of compound **2a**.

bc in CDCl<sub>3</sub>

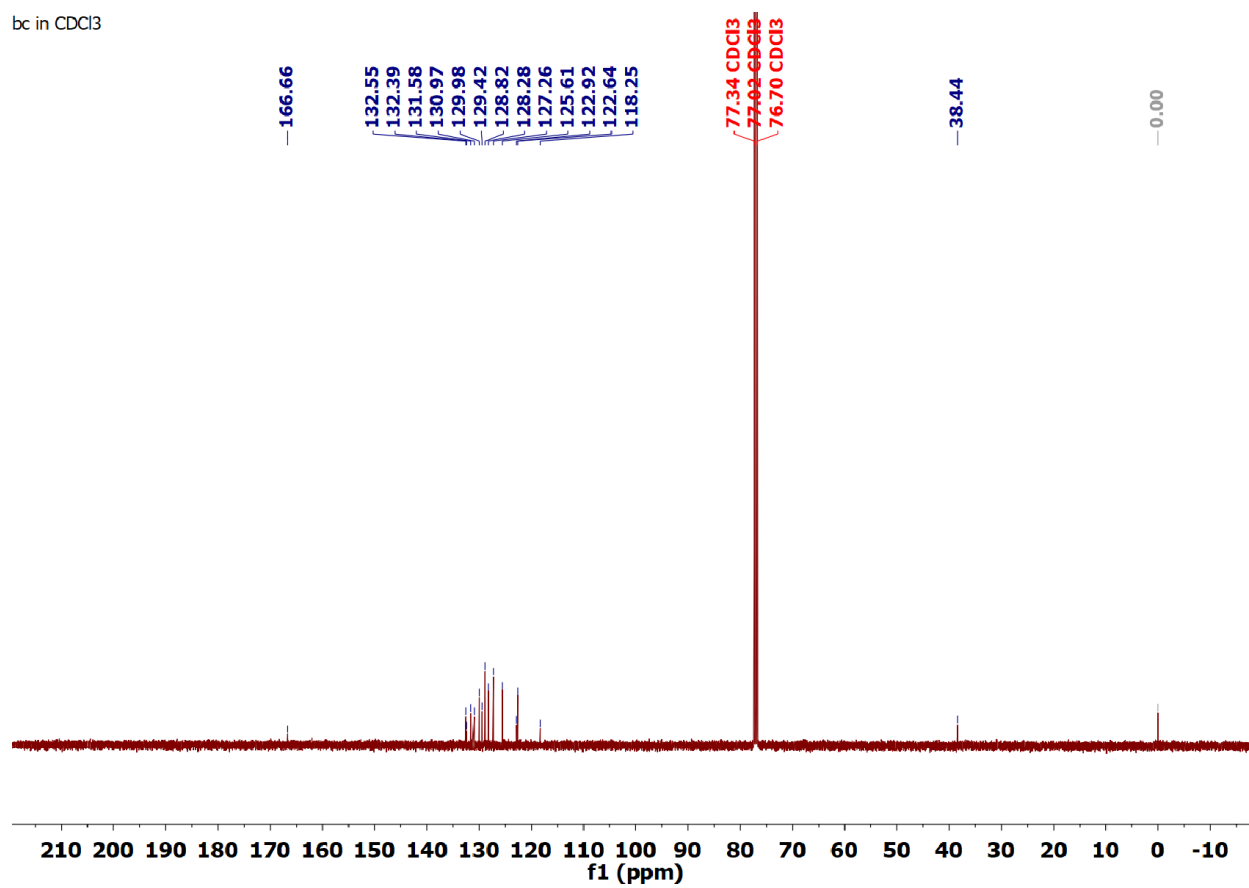

Fig. S-2 <sup>13</sup>C NMR (100 MHz, CDCl<sub>3</sub>) spectrum of compound 2a.

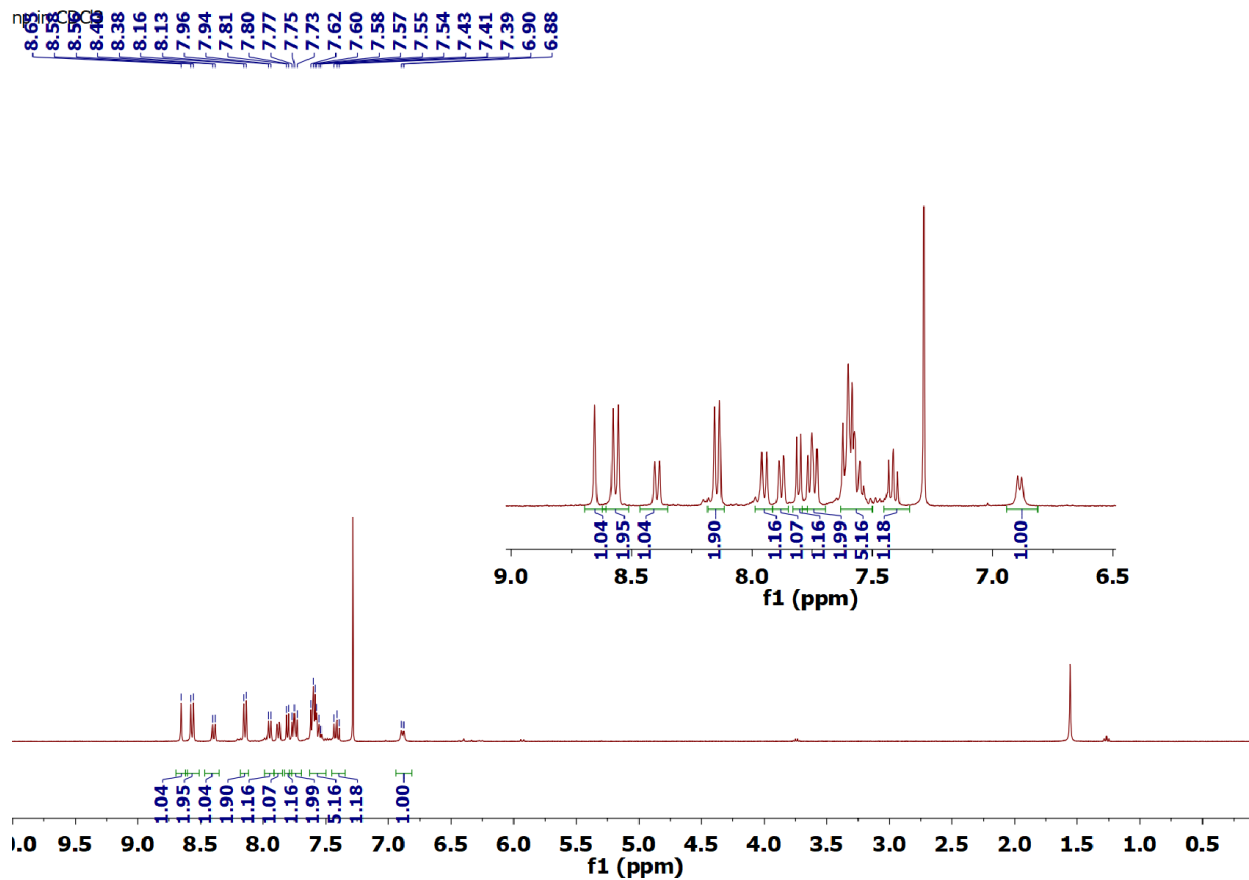

Fig. S-3 <sup>1</sup>H NMR (400 MHz, CDCl<sub>3</sub>) spectrum of compound 2b.

mp in CDCl<sub>3</sub>

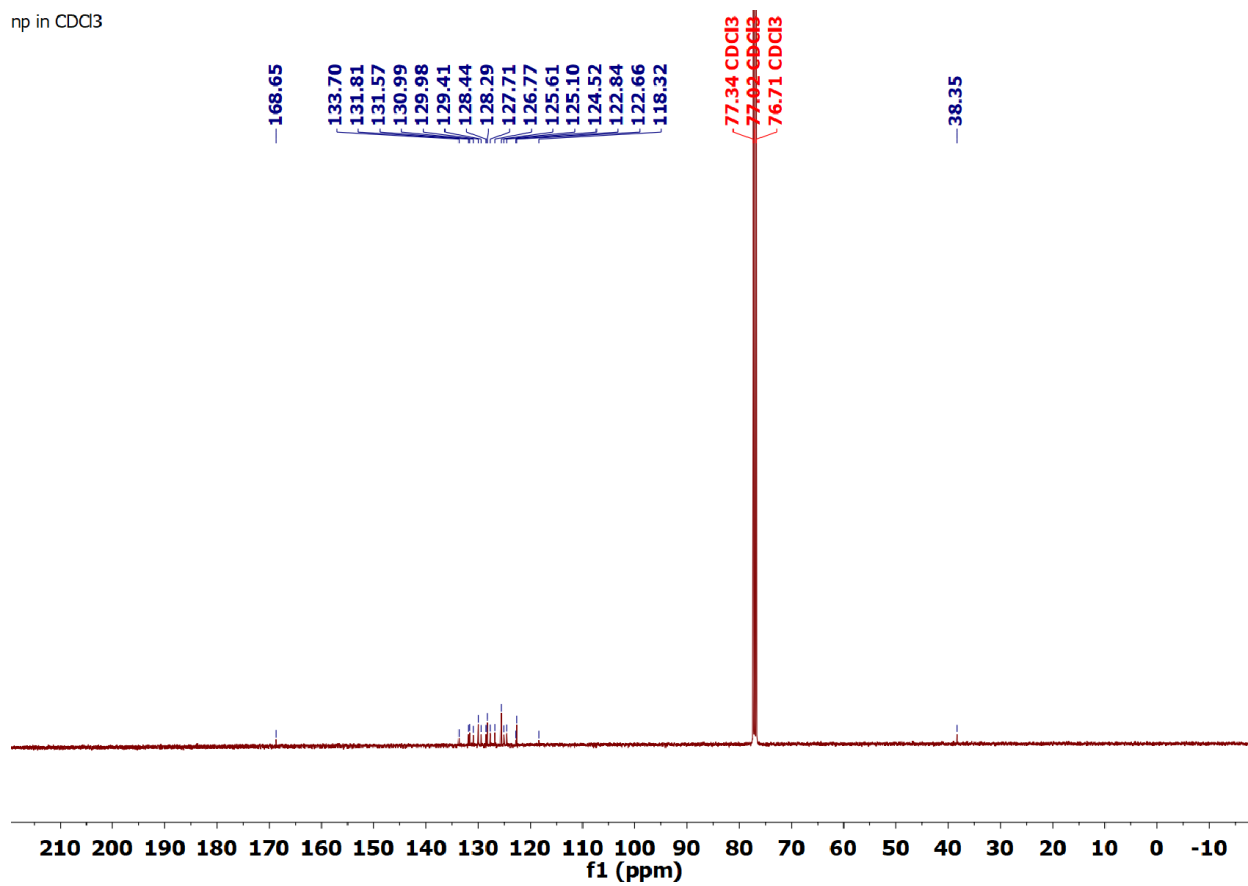

Fig. S-4 <sup>13</sup>C NMR (100 MHz, CDCl<sub>3</sub>) spectrum of compound 2b.

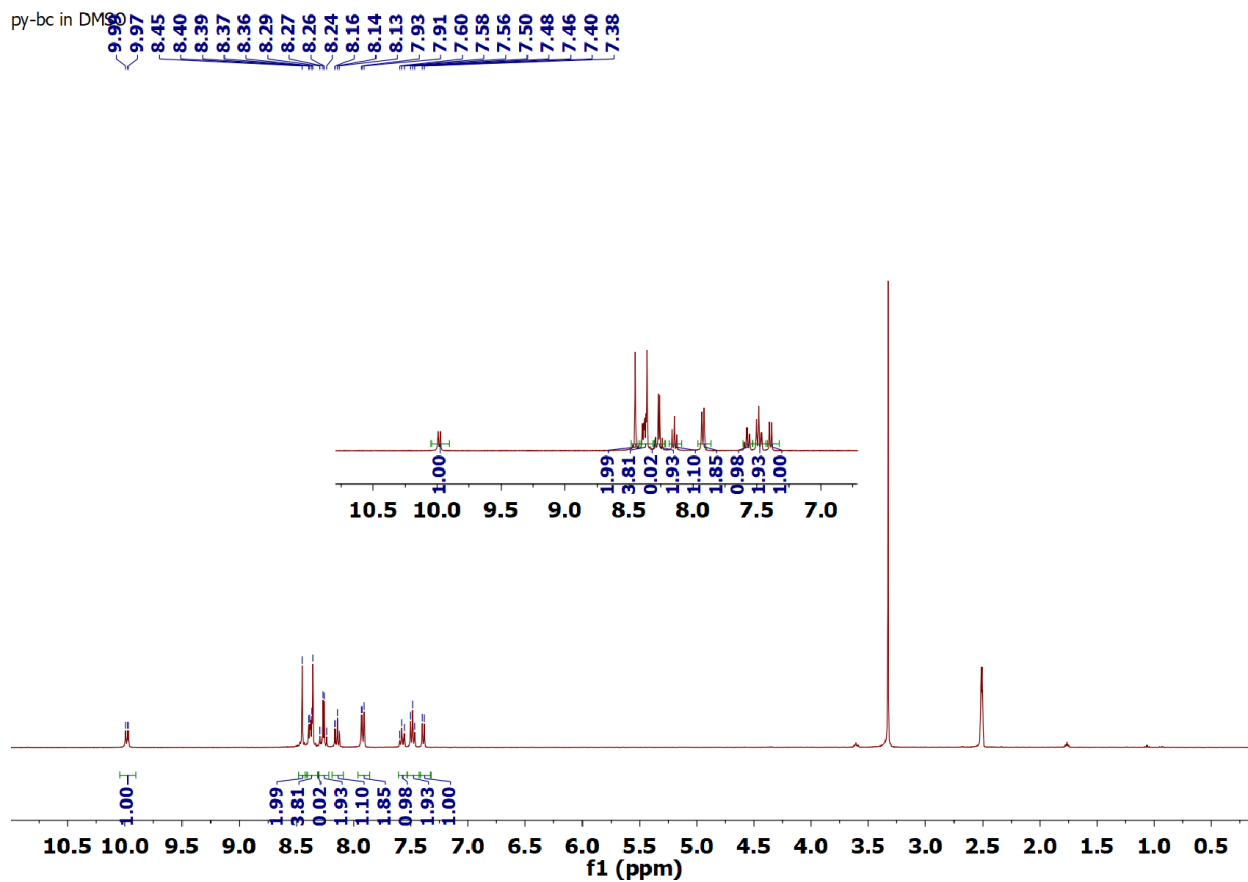

Fig. S-5  $^1\text{H}$  NMR (400 MHz,  $\text{DMSO-}d_6$ ) spectrum of compound **3a**.



bc in CDCl3

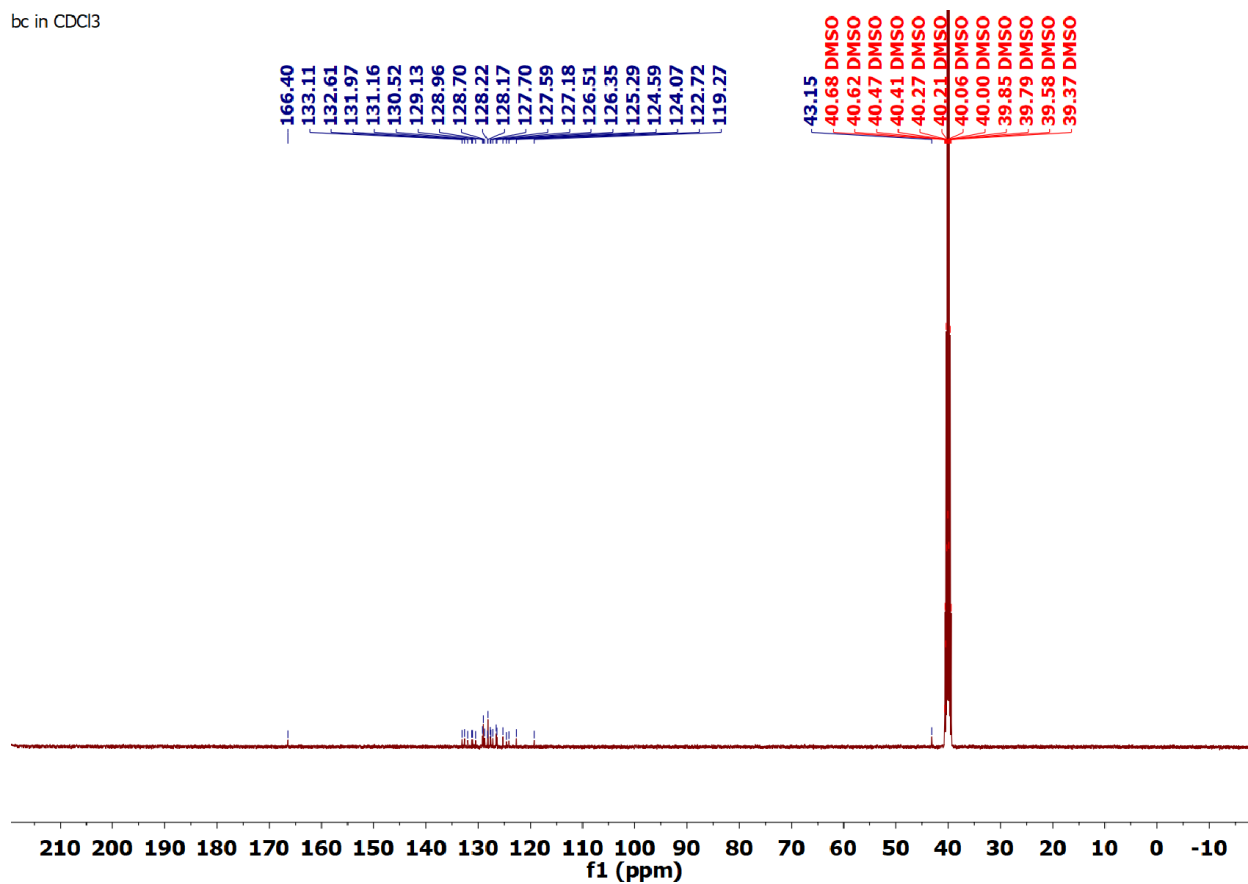

Fig. S-6  $^{13}\text{C}$  NMR (100 MHz, DMSO- $d_6$ ) spectrum of compound 3a.

np-py in DMSO

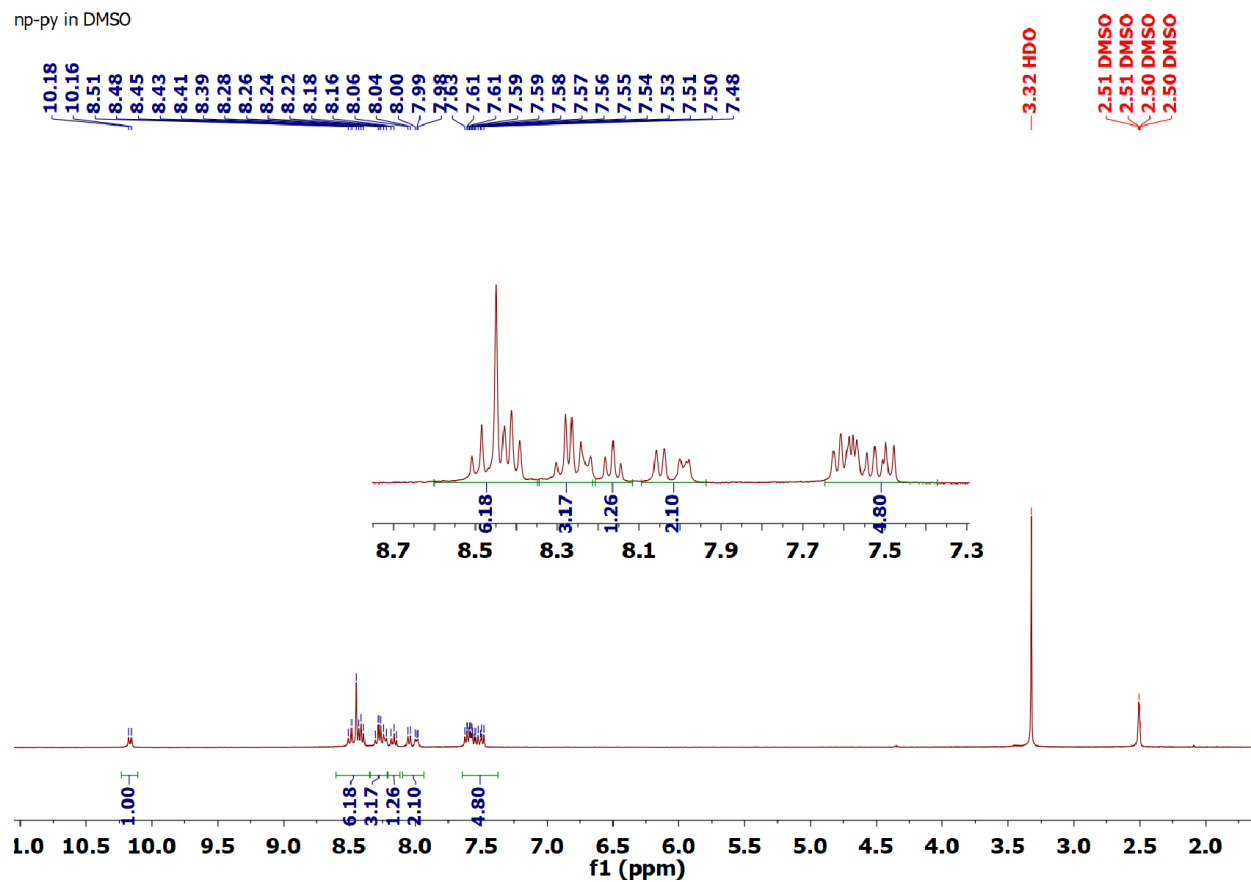

Fig. S-7  $^1\text{H}$  NMR (400 MHz,  $\text{DMSO-}d_6$ ) spectrum of compound **3b**.

np-py dms0

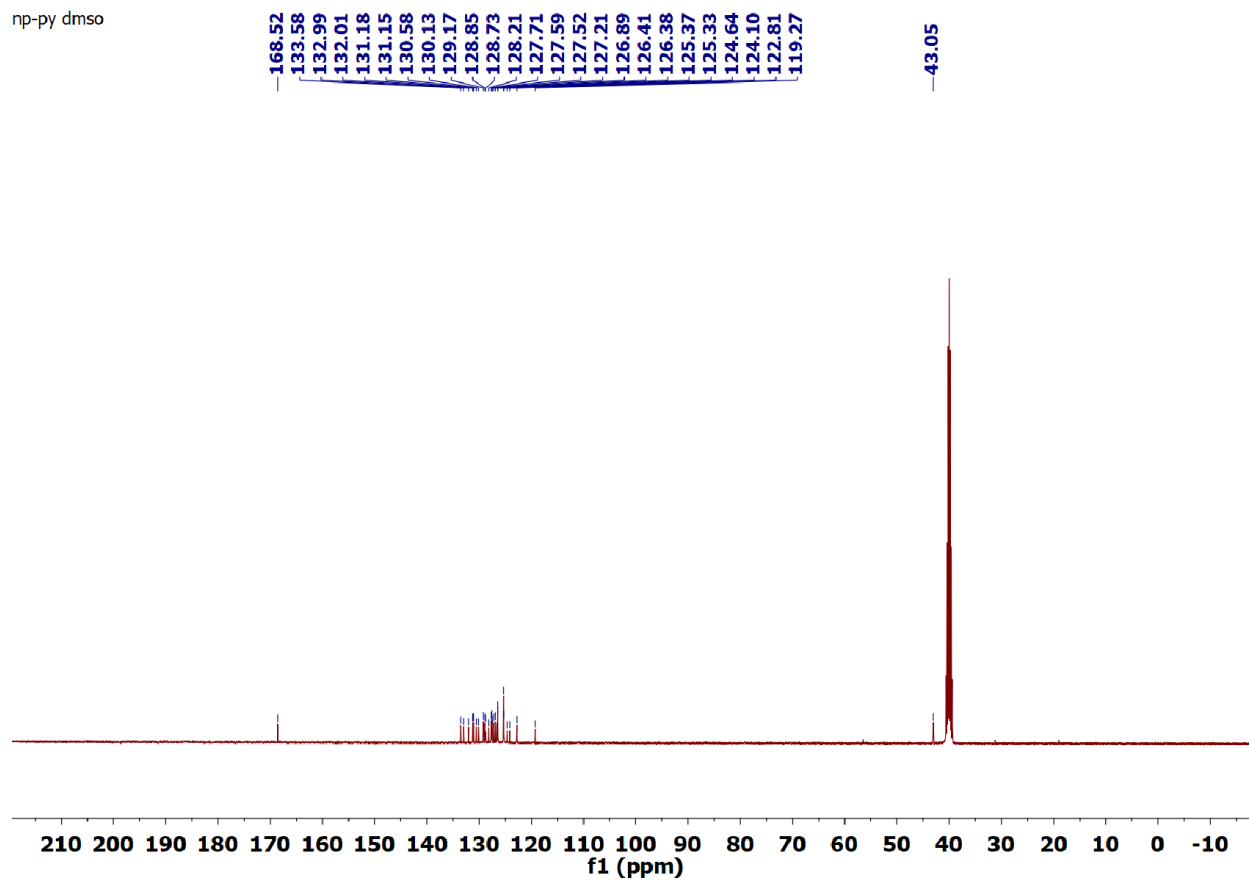

**Fig. S-8**  $^{13}\text{C}$  NMR (100 MHz,  $\text{DMSO-}d_6$ ) spectrum of compound **3b**.

### 3. UV-Vis Titrations of Compounds 2-3 with TBAF

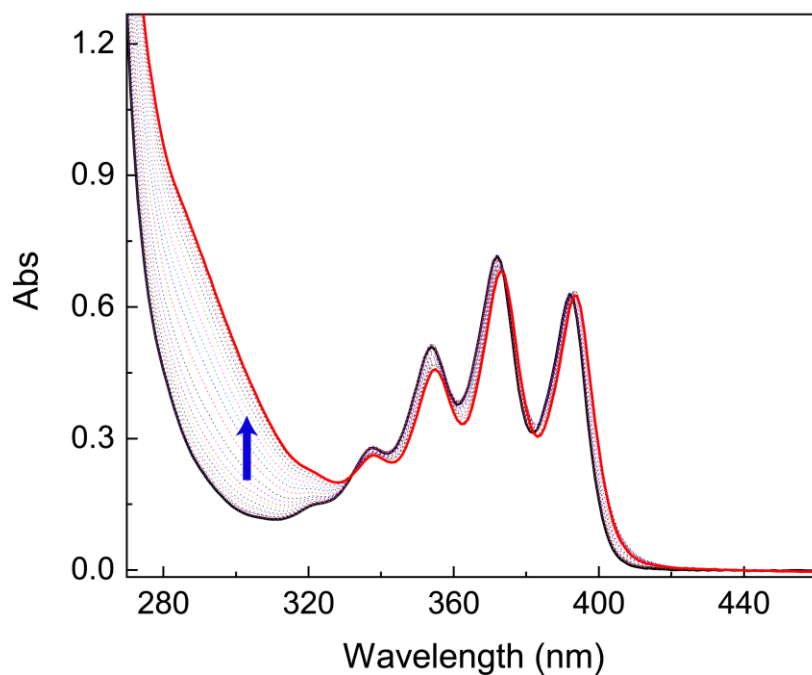

**Fig. S-9** UV-Vis absorption spectra monitoring the titration of **2a** ( $5.55 \times 10^{-5}$  M) with TBAF (from 0 to 65.1 equivalents) in DMSO. The arrow indicates the trend of increasing titration.

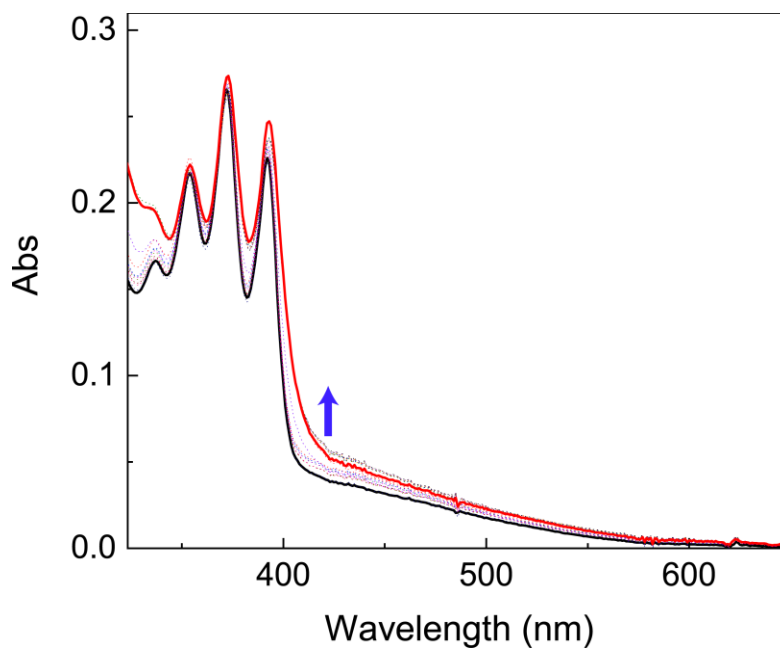

**Fig. S-10** UV-Vis absorption spectra monitoring the titration of **2b** ( $2.42 \times 10^{-5}$  M) with TBAF (from 0 to 211 equivalents) in DMSO. The arrow indicates the trend of increasing titration.

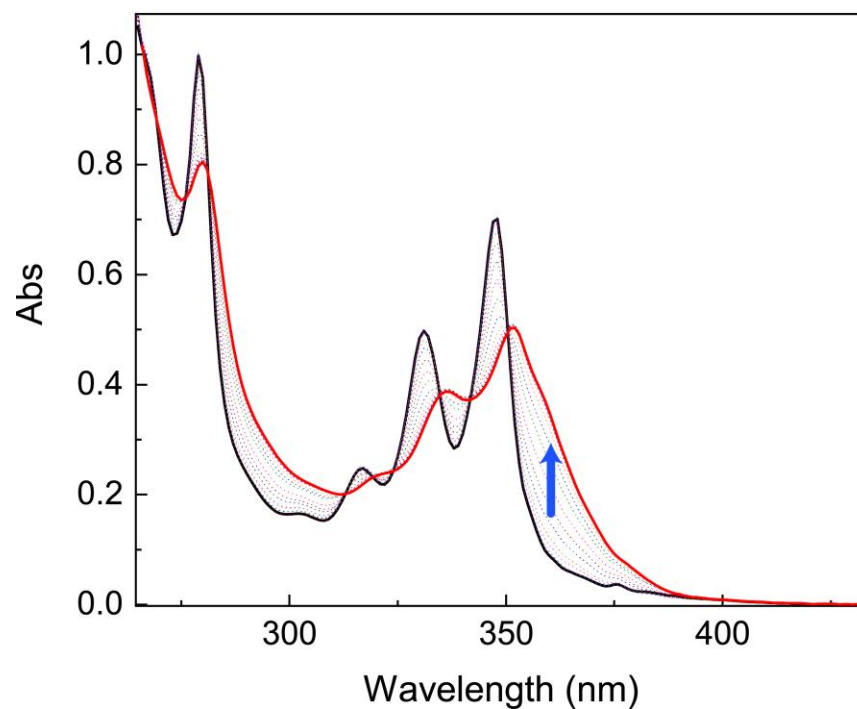

**Fig. S-11** UV-Vis absorption spectra monitoring the titration of **3a** ( $1.66 \times 10^{-5}$  M) with TBAF (from 0 to 120 equivalents) in DMSO. The arrow indicates the trend of increasing titration.

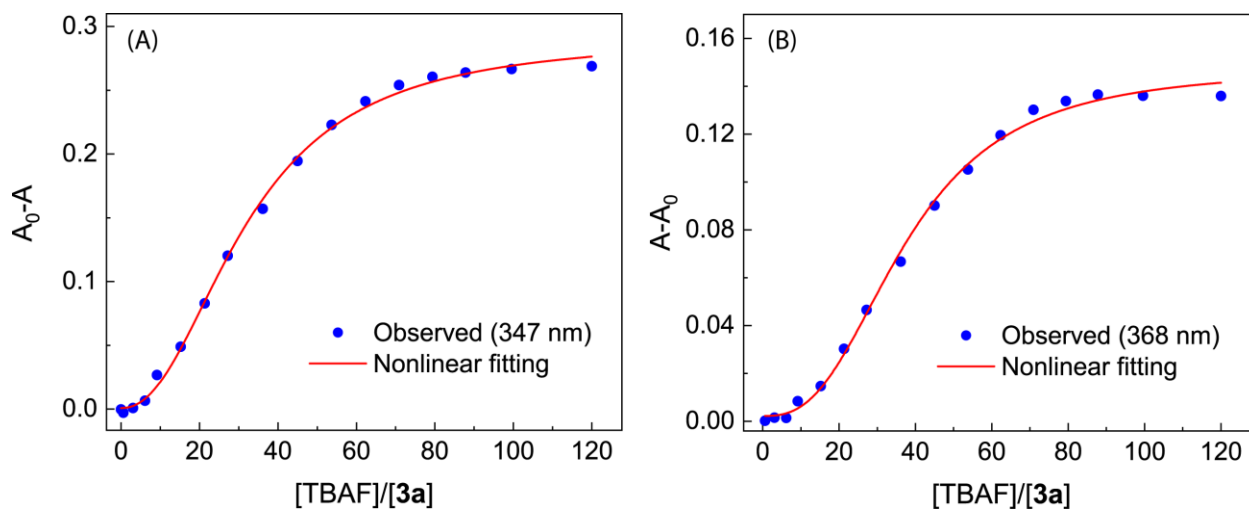

**Fig. S-12** Plots of absorbance change against molar equivalent of TBAF during the titration of **3a** ( $1.66 \times 10^{-5}$  M) with TBAF (from 0 to 120 equivalents) in DMSO. (A) at 347 nm, (B) at 368 nm.  $A_0$  is the absorbance measured before titration, and  $A$  is the absorbance measured during the titration.

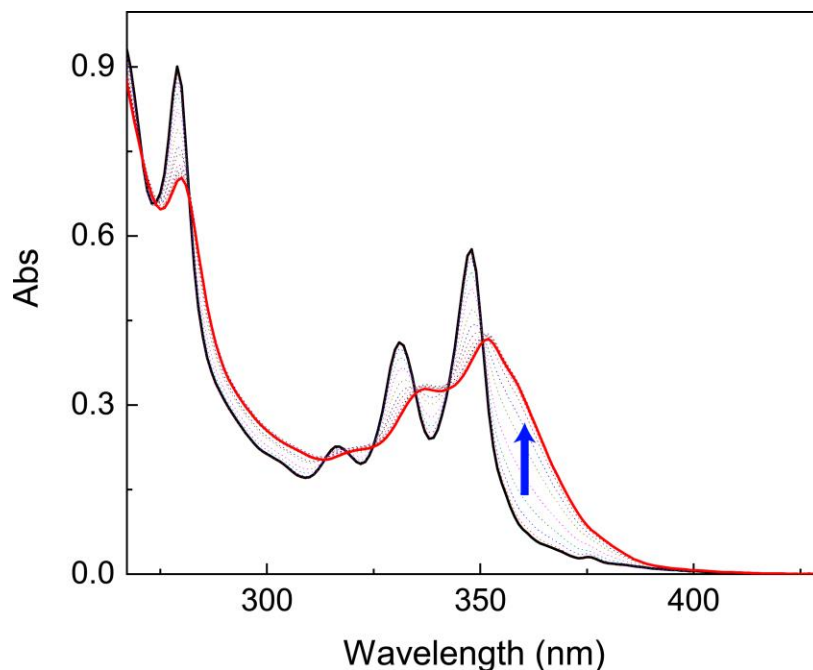

**Fig. S-13** UV-Vis absorption spectra monitoring the titration of **3b** ( $1.45 \times 10^{-5}$  M) with TBAF (from 0 to 123 equivalents) in DMSO. The arrow indicates the trend of increasing titration.

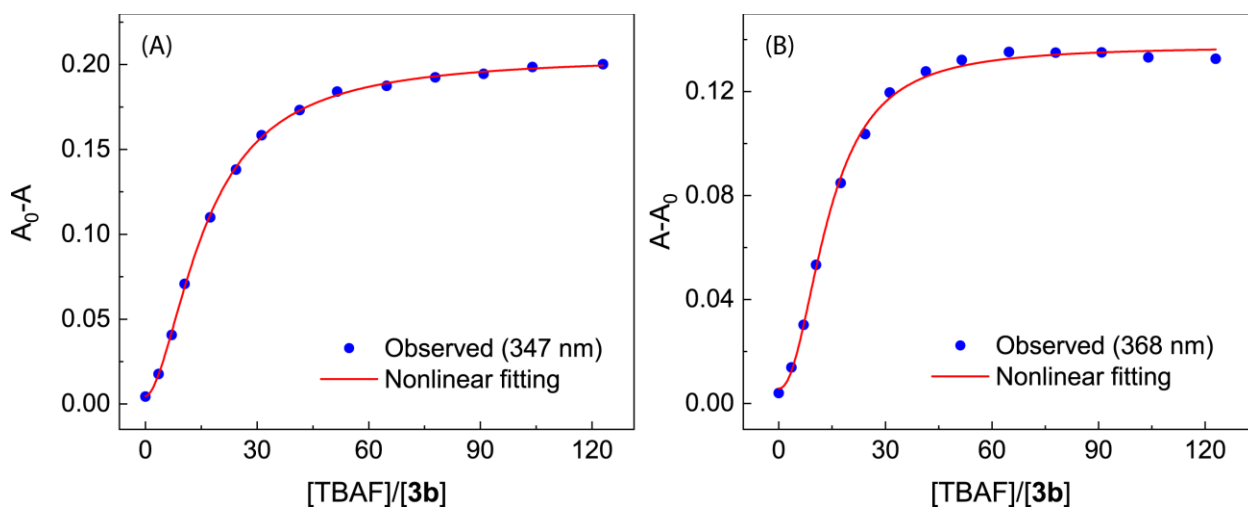

**Fig. S-14** Plots of absorbance change against molar equivalent of TBAF during the titration of **3b** ( $1.45 \times 10^{-5}$  M) with TBAF (from 0 to 123 equivalents) in DMSO. (A) at 347 nm, (B) at 368 nm.  $A_0$  is the absorbance measured before titration, and  $A$  is the absorbance measured during the titration.

#### 4. $^1\text{H}$ NMR Titrations of Compounds **2a** with TBAF

To understand the interactions of compounds **2** and **3** with fluoride anion in the solution phase,  $^1\text{H}$  NMR titration experiment of **2a** with TBAF in acetone- $d_6$  was conducted. As shown in Fig. S-15, the aromatic region of **2a** was monitored during the titration process. Assignments of the amido N-H and various aromatic (phenyl and anthryl) protons in **2a** are given in Scheme S-2.

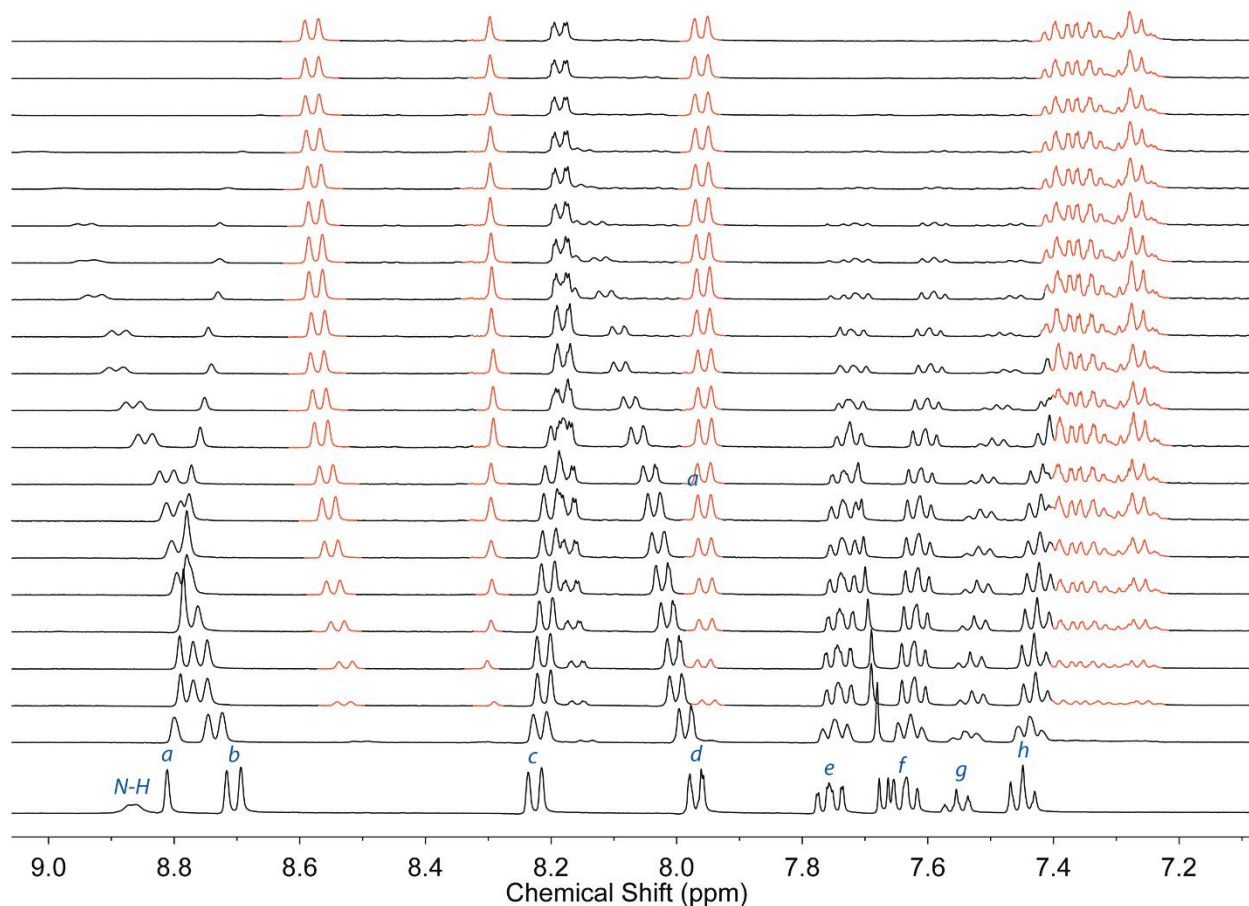

**Fig. S-15**  $^1\text{H}$  NMR (400 MHz, acetone- $d_6$ ) spectra monitoring the titration of **2a** ( $1.7 \times 10^{-3}$  M) with TBAF. TBAF was added from 0.00 to 2.50 molar equiv (from bottom to top), and 0.125 molar equiv of TBAF was added in each step.

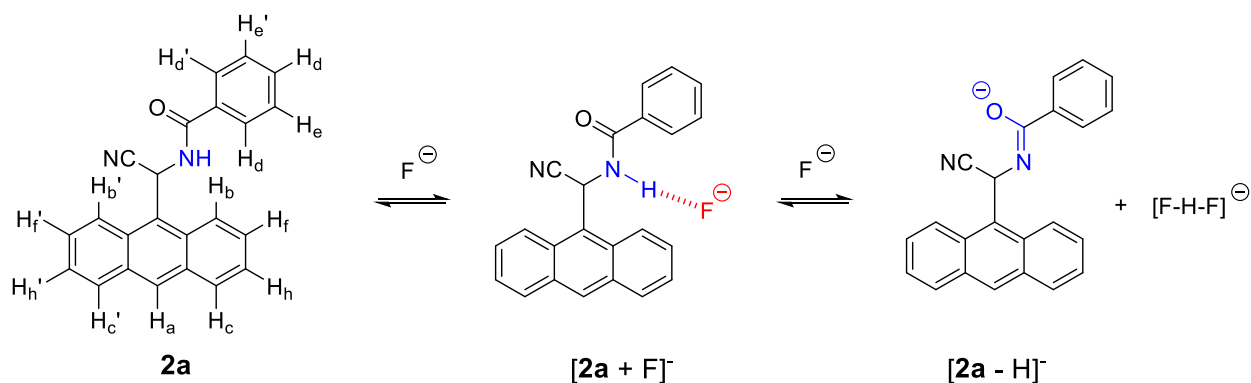

**Scheme S-2** Stepwise interactions of **2a** with fluoride anion in the solution phase.

The  $^1H$  NMR titration results are in agreement with the two steps shown in Scheme S-2. In the first step, a hydrogen-bonded complex  $[2a + F]^-$  is formed, resulting in immediate disappearance of the amido NH signal and significant shifts of other aromatic proton signals. The NMR patterns confirm that this step is a rapid equilibrium process. With increasing addition of TBAF, a new set of proton signals (highlighted by red color in Fig. S-15) emerge with increasing intensity, but no significant shifts in their resonance frequencies. These signals can be assigned to the deprotonation step illustrated in Scheme S-2, resulting in a deprotonated anion of **2a**. This assignment is further evidenced by the  $^1H$  NMR titration experiment of **2a** with NaOH carried out in  $DMSO-d_6$ . Herein,  $DMSO-d_6$  was chosen as the solvent in consideration of the solubility of NaOH. As shown in Fig. S-16, after addition of more than 3.50 molar equiv of base (NaOH) into the solution of **2a**, the  $^1H$  NMR spectrum is significantly changed into a new spectral pattern that bears resemblance to the pattern observed at the end stage of the fluoride titration (see Fig. S-15). Overall, our NMR titration results concur with the UV-Vis and fluorescence titration data, confirming that two steps take place when the cyanomethylcarbamoyl bridge of **2a** is interacting with fluoride anion. This mechanism should be operative in the cases of **2b**, and **3a/b** as well, given that they contain the same cyanomethylcarbamoyl bridge in their molecular structures.



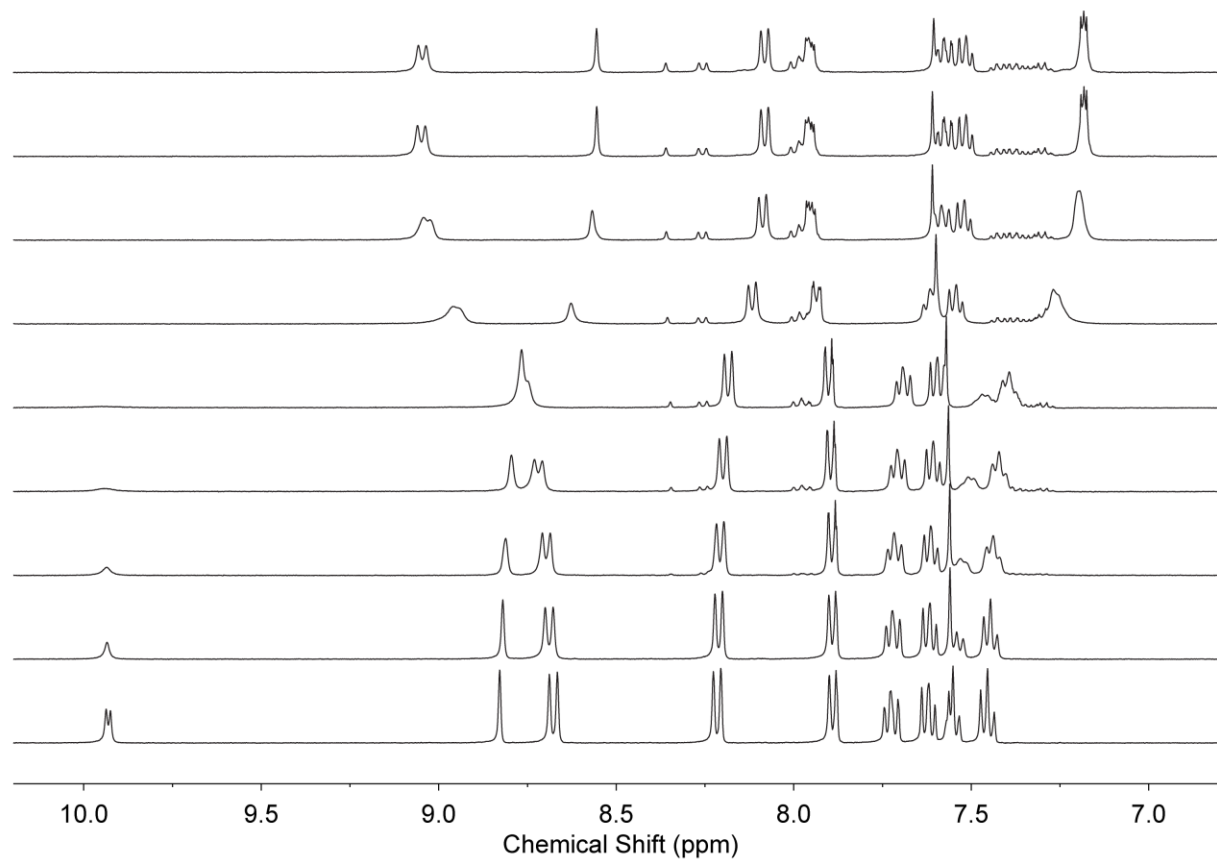

**Fig. S-16**  $^1\text{H}$  NMR (400 MHz,  $\text{DMSO-}d_6$ ) spectra monitoring the titration of **2a** ( $1.7 \times 10^{-3}$  M) with NaOH. NaOH was added from 0.00 to 4.00 molar equiv (from bottom to top), and 0.50 molar equiv of NaOH was added in each step.

## 5. High-Resolution Mass Spectra for Compounds 2-3

### Qualitative Compound Report

Data File: mf6958d.d      Sample Name: BC  
 Sample Type: Sample      Position: Vial 2  
 Instrument Name: LCMS 1260\_6230      User Name: crit-TOF\agilent  
 Acq Method: dhrishikesh.m      Acquired Time: 9/24/2020 3:56:03 PM  
 IRM Calibration Status: Success      DA Method: dm.m  
 Comment: CHCl3-positive-APPI

Sample Group: Info.  
 Acquisition SW: 6200 series TOF/6500 series  
 Version: Q-TOF B.05.01 (B5125.3)

#### Compound Table

| Compound Label      | RT    | Mass      | Abund | Formula      | Tgt Mass  | Diff (ppm) | MFG Formula  | DB Formula   |
|---------------------|-------|-----------|-------|--------------|-----------|------------|--------------|--------------|
| Cpd 1: C23 H16 N2 O | 0.101 | 336.12756 | 8150  | C23 H16 N2 O | 336.12626 | -3.86      | C23 H16 N2 O | C23 H16 N2 O |

| Compound Label      | m/z      | RT    | Algorithm       | Mass      |
|---------------------|----------|-------|-----------------|-----------|
| Cpd 1: C23 H16 N2 O | 337.1349 | 0.101 | Find By Formula | 336.12756 |

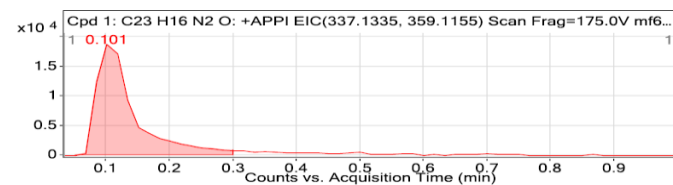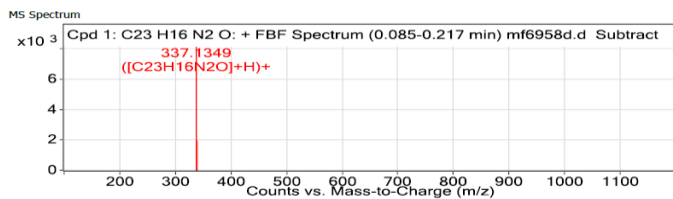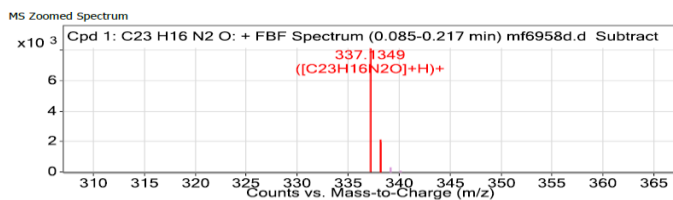

#### MS Spectrum Peak List

| m/z      | z | Abund   | Formula   | Ion                |
|----------|---|---------|-----------|--------------------|
| 337.1349 | 1 | 8149.66 | C23H16N2O | (M+H) <sup>+</sup> |
| 338.1379 | 1 | 2020.1  | C23H16N2O | (M+H) <sup>+</sup> |

--- End Of Report ---

Fig. S-17 High-resolution mass spectrum (APPI-TOF, positive mode) of compound **2a**.

## Qualitative Compound Report

|                        |                |               |                      |
|------------------------|----------------|---------------|----------------------|
| Data File              | mf6958a.d      | Sample Name   | Np                   |
| Sample Type            | Sample         | Position      | 2                    |
| Instrument Name        | LCMS 1260_6230 | User Name     | crit-TOF\agilent     |
| Acq Method             | dhrrshikesh.m  | Acquired Time | 9/24/2020 3:40:56 PM |
| IRM Calibration Status | Success        | DA Method     | dm.m                 |
| Comment                | CHCl3-positive |               |                      |

|                |                             |       |  |
|----------------|-----------------------------|-------|--|
| Sample Group   |                             | Info. |  |
| Acquisition SW | 6200 series TOF/6500 series |       |  |
| Version        | Q-TOF B.05.01 (B5125.3)     |       |  |

### Compound Table

| Compound Label      | RT    | Mass      | Abund | Formula      | Tgt Mass  | Diff (ppm) | MFG Formula  | DB Formula   |
|---------------------|-------|-----------|-------|--------------|-----------|------------|--------------|--------------|
| Cpd 1: C27 H18 N2 O | 0.103 | 386.14304 | 25164 | C27 H18 N2 O | 386.14191 | 2.91       | C27 H18 N2 O | C27 H18 N2 O |

| Compound Label      | m/z      | RT    | Algorithm       | Mass      |
|---------------------|----------|-------|-----------------|-----------|
| Cpd 1: C27 H18 N2 O | 387.1502 | 0.103 | Find By Formula | 386.14304 |

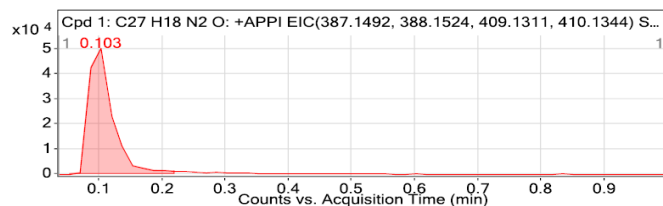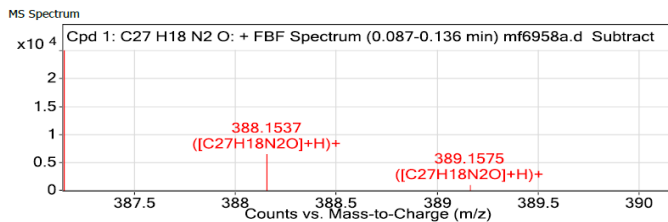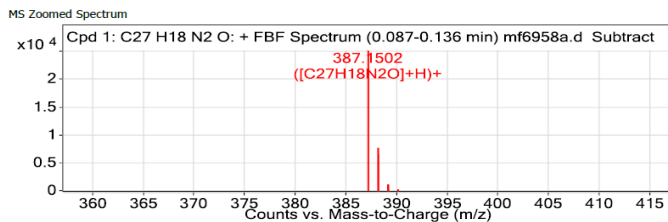

### MS Spectrum Peak List

| m/z      | z | Abund    | Formula   | Ion    |
|----------|---|----------|-----------|--------|
| 387.1502 | 1 | 25163.94 | C27H18N2O | (M+H)+ |
| 388.1537 | 1 | 6677.8   | C27H18N2O | (M+H)+ |
| 389.1575 | 1 | 1171.53  | C27H18N2O | (M+H)+ |
| 390.16   | 1 | 69.08    | C27H18N2O | (M+H)+ |

--- End Of Report ---

**Fig. S-18** High-resolution mass spectrum (APPI-TOF, positive mode) of compound **2b**.

## Qualitative Compound Report

|                        |                     |               |                      |
|------------------------|---------------------|---------------|----------------------|
| Data File              | mf6958e.d           | Sample Name   | Py-BC                |
| Sample Type            | Sample              | Position      | Vial 2               |
| Instrument Name        | LCMS 1260_6230      | User Name     | crit-TOF\agilent     |
| Acq Method             | dhrishikesh.m       | Acquired Time | 9/24/2020 4:02:35 PM |
| IRM Calibration Status | Success             | DA Method     | dm.m                 |
| Comment                | CHCl3-positive-APPI |               |                      |

|                |                             |
|----------------|-----------------------------|
| Sample Group   | Info.                       |
| Acquisition SW | 6200 series TOF/6500 series |
| Version        | Q-TOF B.05.01 (B5125.3)     |

### Compound Table

| Compound Label      | RT    | Mass      | Abund | Formula      | Tgt Mass  | Diff (ppm) | MFG Formula  | DB Formula   |
|---------------------|-------|-----------|-------|--------------|-----------|------------|--------------|--------------|
| Cpd 1: C25 H16 N2 O | 0.107 | 360.12558 | 4480  | C25 H16 N2 O | 360.12626 | -1.91      | C25 H16 N2 O | C25 H16 N2 O |

| Compound Label      | m/z      | RT    | Algorithm       | Mass      |
|---------------------|----------|-------|-----------------|-----------|
| Cpd 1: C25 H16 N2 O | 361.1324 | 0.107 | Find By Formula | 360.12558 |

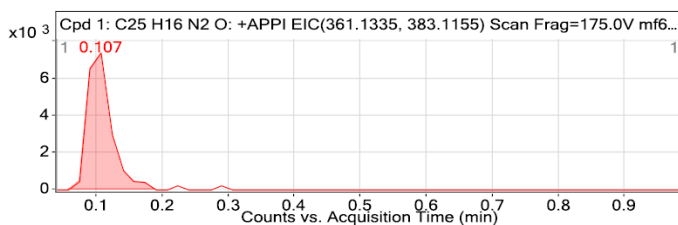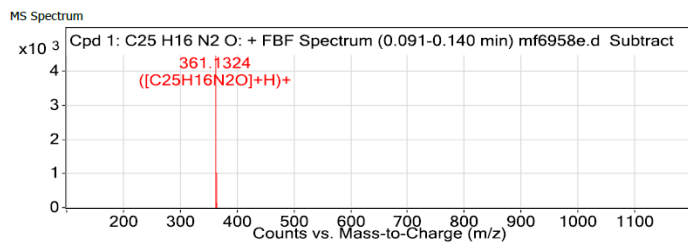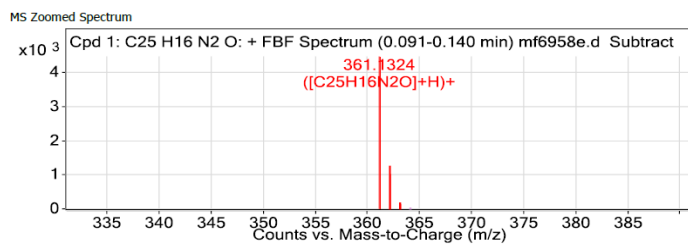

### MS Spectrum Peak List

| m/z      | z | Abund   | Formula   | Ion    |
|----------|---|---------|-----------|--------|
| 361.1324 | 1 | 4479.93 | C25H16N2O | (M+H)+ |
| 362.1378 | 1 | 1055.43 | C25H16N2O | (M+H)+ |
| 363.1397 | 1 | 171.21  | C25H16N2O | (M+H)+ |

--- End Of Report ---

**Fig. S-19** High-resolution mass spectrum (APPI-TOF, positive mode) of compound **3a**.

## Qualitative Compound Report

|                        |                     |               |                      |
|------------------------|---------------------|---------------|----------------------|
| Data File              | mf6958f.d           | Sample Name   | Py-np                |
| Sample Type            | Sample              | Position      | Vial 2               |
| Instrument Name        | LCMS 1260_6230      | User Name     | crit-TOF\agilent     |
| Acq Method             | dhrishikesh.m       | Acquired Time | 9/24/2020 4:10:28 PM |
| IRM Calibration Status | Success             | DA Method     | dm.m                 |
| Comment                | CHCl3-positive-APPI |               |                      |

|                |                             |       |  |
|----------------|-----------------------------|-------|--|
| Sample Group   |                             | Info. |  |
| Acquisition SW | 6200 series TOF/6500 series |       |  |
| Version        | Q-TOF B.05.01 (B5125.3)     |       |  |

### Compound Table

| Compound Label      | RT    | Mass      | Abund | Formula      | Tgt Mass  | Diff (ppm) | MFG Formula  | DB Formula   |
|---------------------|-------|-----------|-------|--------------|-----------|------------|--------------|--------------|
| Cpd 1: C29 H18 N2 O | 0.107 | 410.14152 | 9898  | C29 H18 N2 O | 410.14191 | -0.97      | C29 H18 N2 O | C29 H18 N2 O |

| Compound Label      | m/z      | RT    | Algorithm       | Mass      |
|---------------------|----------|-------|-----------------|-----------|
| Cpd 1: C29 H18 N2 O | 411.1486 | 0.107 | Find By Formula | 410.14152 |

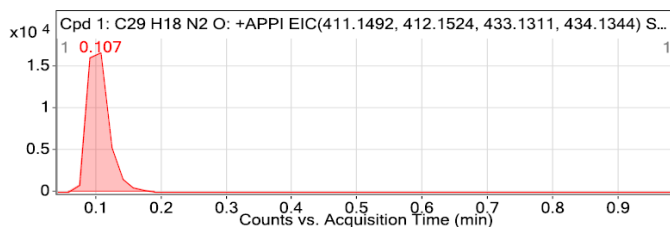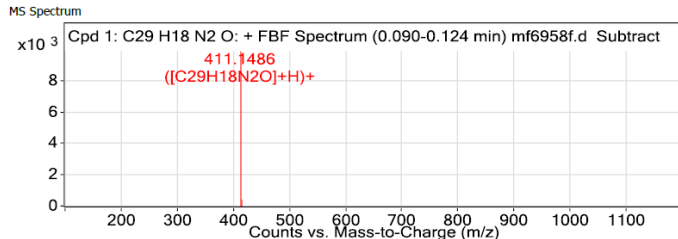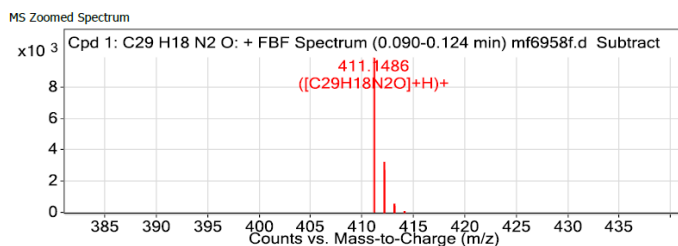

### MS Spectrum Peak List

| m/z      | z | Abund   | Formula   | Ion    |
|----------|---|---------|-----------|--------|
| 411.1486 | 1 | 9898.46 | C29H18N2O | (M+H)+ |
| 412.153  | 1 | 2751.22 | C29H18N2O | (M+H)+ |
| 413.1547 | 1 | 474.26  | C29H18N2O | (M+H)+ |
| 414.1532 | 1 | 67.74   | C29H18N2O | (M+H)+ |

--- End Of Report ---

**Fig. S-20** High-resolution mass spectrum (APPI-TOF, positive mode) of compound **3b**.

## 6. Concentration-Dependent Fluorescence Behavior of 2 and 3

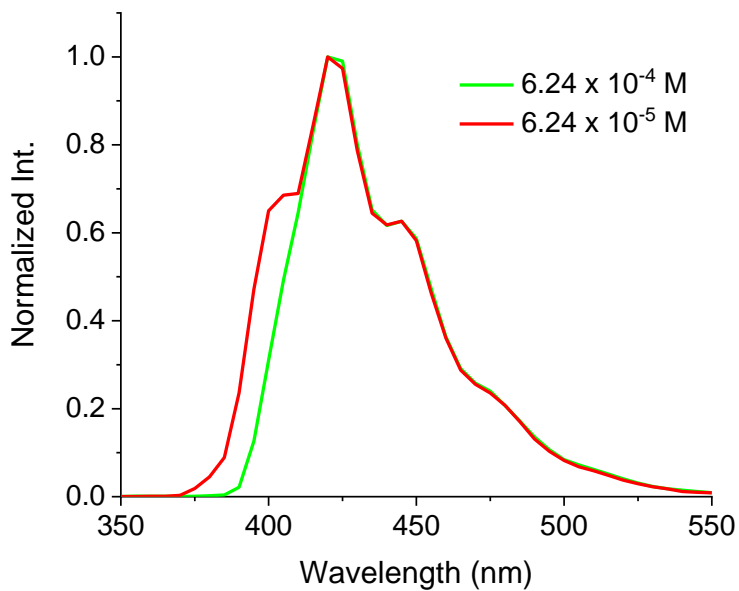

**Fig. S-21** Normalized fluorescence spectra of **2a** measured in  $\text{CH}_2\text{Cl}_2$  at different concentrations ( $\lambda_{\text{ex}} = 345$  nm).

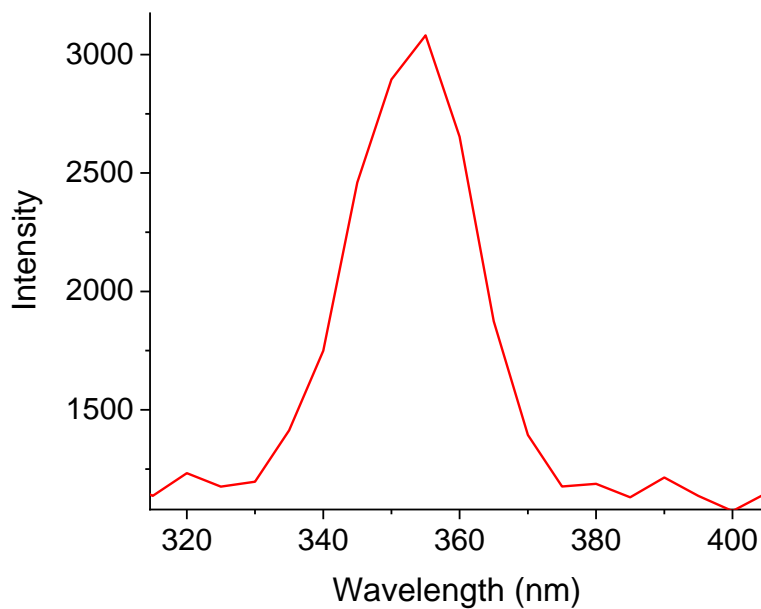

**Fig. S-22** Excitation spectrum of **2a** ( $6.24 \times 10^{-5}$  M in  $\text{CH}_2\text{Cl}_2$ ) monitoring the emission at 350 nm.

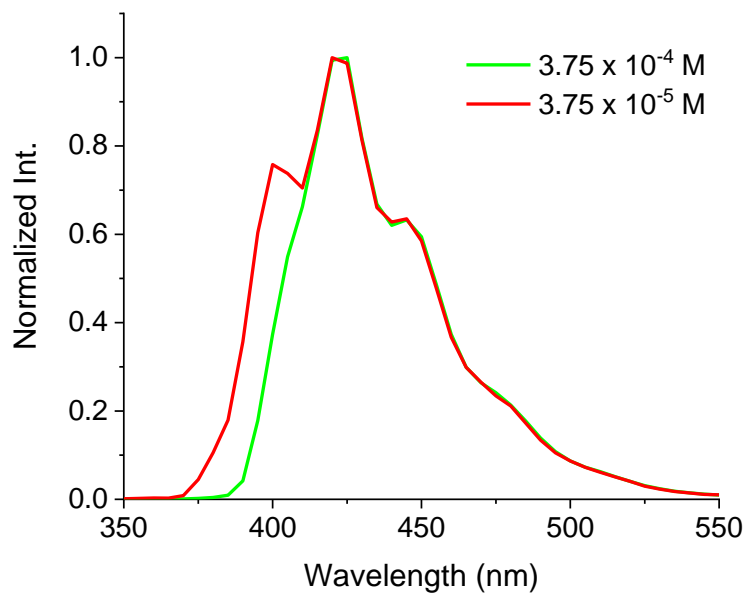

**Fig. S-23** Normalized fluorescence spectra of **2b** measured in CH<sub>2</sub>Cl<sub>2</sub> at different concentrations ( $\lambda_{\text{ex}} = 345$  nm).

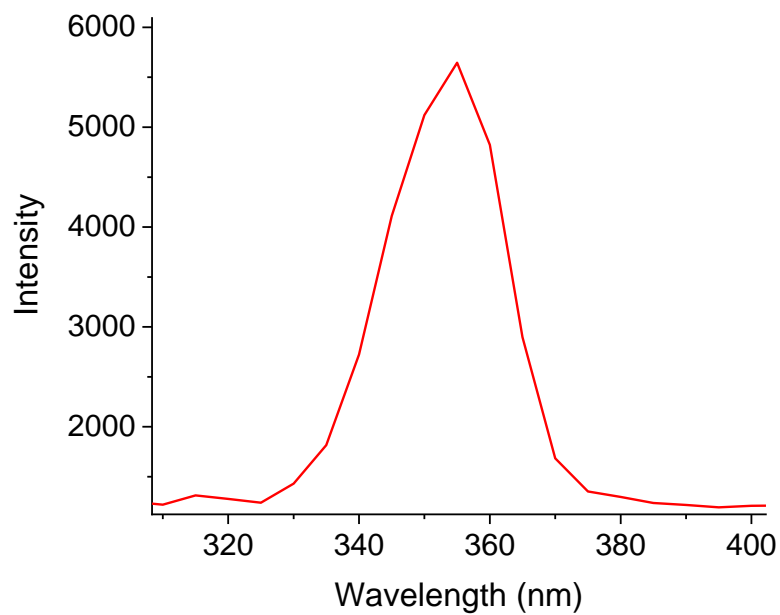

**Fig. S-24** Excitation spectrum of **2b** ( $3.75 \times 10^{-5}$  M in CH<sub>2</sub>Cl<sub>2</sub>) monitoring the emission at 350 nm.

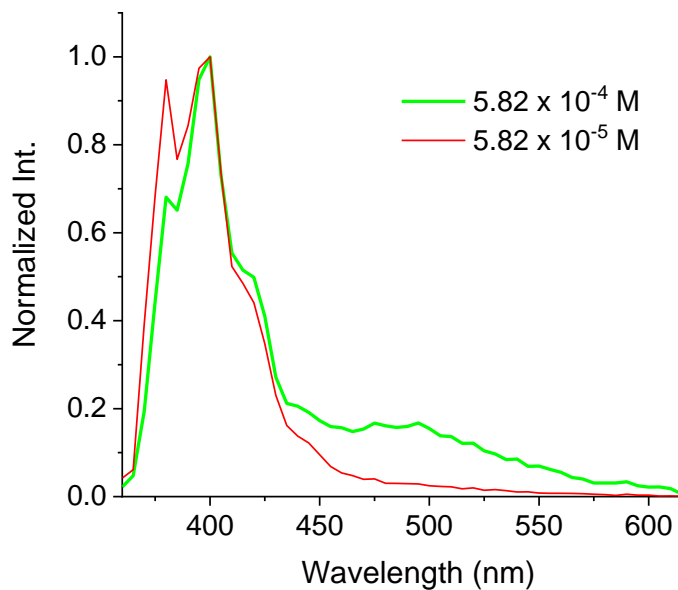

**Fig. S-25** Normalized fluorescence spectra of **3a** measured in  $\text{CH}_2\text{Cl}_2$  at different concentrations ( $\lambda_{\text{ex}} = 345$  nm).

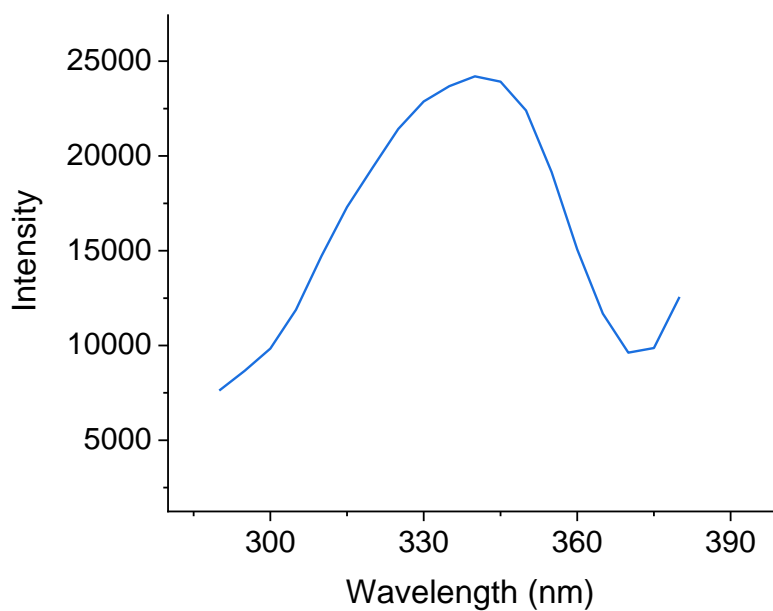

**Fig. S-26** Excitation spectrum of **3a** ( $5.82 \times 10^{-5}$  M in  $\text{CH}_2\text{Cl}_2$ ) monitoring the emission at 380 nm.



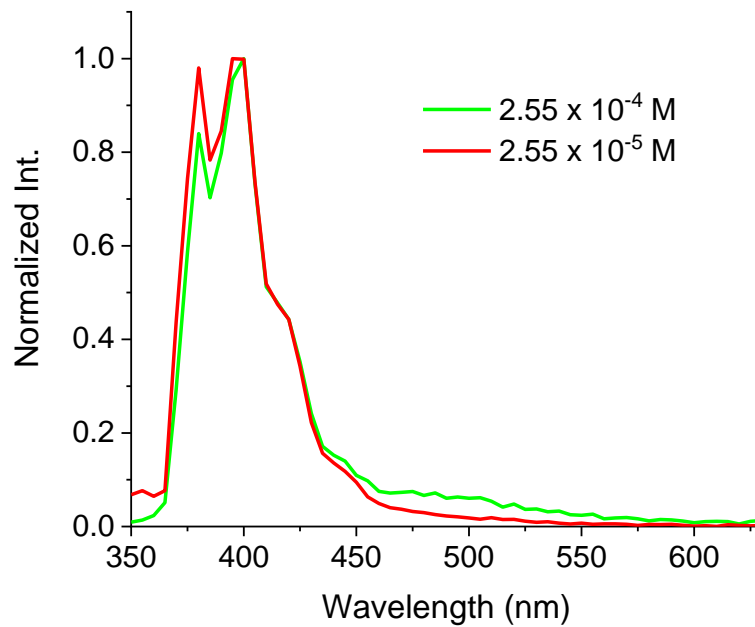

**Fig. S-27** Normalized fluorescence spectra of **3b** measured in  $\text{CH}_2\text{Cl}_2$  at different concentrations ( $\lambda_{\text{ex}} = 345$  nm).

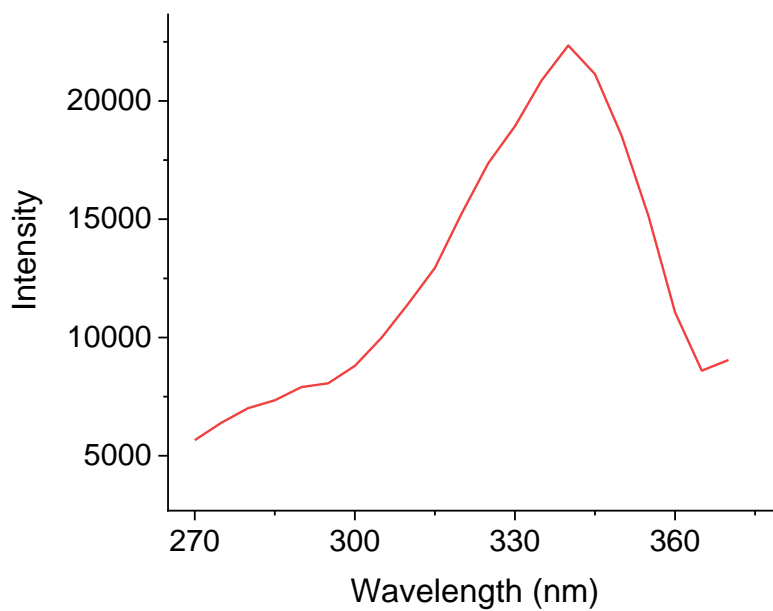

**Fig. S-28** Excitation spectrum of **3b** ( $2.55 \times 10^{-5}$  M in  $\text{CH}_2\text{Cl}_2$ ) monitoring the emission at 380 nm.

## 7. Detailed Results of DFT and TD-DFT Calculations

Cartesian coordinates and optimized **2a** in gas phase:  $E(\text{RB3LYP}) = -1071.090425$  hartrees;  
Dipole Moment = 5.911315 Debye; Basis Set = 6-311+G(d,p).

|   |          |          |          |
|---|----------|----------|----------|
| O | -2.12340 | -1.79460 | 1.25280  |
| N | -1.19620 | 0.22790  | 0.78700  |
| H | -1.20810 | 1.01790  | 0.16100  |
| N | 0.36160  | 1.25680  | 3.68820  |
| C | -2.20880 | -0.70150 | 0.71240  |
| C | -3.41900 | -0.29240 | -0.07370 |
| C | -3.78490 | 1.04400  | -0.27390 |
| H | -3.20440 | 1.84740  | 0.16560  |
| C | -4.93060 | 1.35630  | -1.00190 |
| H | -5.21370 | 2.39330  | -1.14160 |
| C | -5.71660 | 0.33790  | -1.53780 |
| H | -6.60700 | 0.58230  | -2.10590 |
| C | -5.36180 | -0.99570 | -1.33280 |
| H | -5.97530 | -1.78990 | -1.74260 |
| C | -4.22390 | -1.31000 | -0.59770 |
| H | -3.94220 | -2.33950 | -0.41540 |
| C | 0.06260  | -0.10020 | 1.45440  |
| H | -0.07600 | -1.12460 | 1.79550  |
| C | 0.23590  | 0.68240  | 2.69610  |
| C | 1.27300  | -0.02610 | 0.52330  |
| C | 1.90220  | -1.22540 | 0.11160  |
| C | 1.47290  | -2.53650 | 0.50400  |
| H | 0.59570  | -2.66570 | 1.12340  |
| C | 2.13190  | -3.66010 | 0.08590  |
| H | 1.77470  | -4.63420 | 0.40000  |
| C | 3.27130  | -3.57210 | -0.75910 |
| H | 3.78030  | -4.47590 | -1.07340 |
| C | 3.70890  | -2.34840 | -1.17580 |
| H | 4.57020  | -2.26150 | -1.82960 |
| C | 3.04670  | -1.14890 | -0.76930 |
| C | 3.48790  | 0.09420  | -1.22040 |
| H | 4.34390  | 0.14000  | -1.88640 |
| C | 2.85540  | 1.27970  | -0.84690 |
| C | 3.30850  | 2.54140  | -1.34020 |
| H | 4.15970  | 2.55310  | -2.01280 |
| C | 2.69080  | 3.70480  | -0.97980 |
| H | 3.04270  | 4.65650  | -1.36060 |
| C | 1.58250  | 3.66600  | -0.09160 |
| H | 1.10360  | 4.59220  | 0.20520  |
| C | 1.12010  | 2.47750  | 0.40580  |
| H | 0.29500  | 2.50410  | 1.10490  |
| C | 1.72680  | 1.22800  | 0.05140  |

Cartesian coordinates and optimized **2b** in gas phase:  $E(\text{RB3LYP}) = -1224.764192$  hartees;  
Dipole Moment = 5.797833 Debye; Basis Set = 6-311+G(d,p).

|   |          |          |          |
|---|----------|----------|----------|
| O | -1.48850 | 0.89940  | 1.93780  |
| N | -0.31560 | -0.79490 | 0.97800  |
| H | -0.30460 | -1.47700 | 0.23550  |
| N | 1.78120  | -2.05330 | 3.40630  |
| C | -1.47090 | -0.08290 | 1.21050  |
| C | -2.68800 | -0.62970 | 0.52040  |
| C | -2.92050 | -1.99130 | 0.55630  |
| H | -2.22640 | -2.64030 | 1.07810  |
| C | -4.07190 | -2.55360 | -0.03470 |
| H | -4.23580 | -3.62320 | 0.02550  |
| C | -4.97690 | -1.74450 | -0.67390 |
| H | -5.86330 | -2.16810 | -1.13450 |
| C | -4.77860 | -0.34100 | -0.74260 |
| C | -5.70800 | 0.49790  | -1.41200 |
| H | -6.57820 | 0.04380  | -1.87420 |
| C | -5.51240 | 1.85520  | -1.47710 |
| H | -6.22870 | 2.48630  | -1.99070 |
| C | -4.37420 | 2.43250  | -0.87070 |
| H | -4.22700 | 3.50540  | -0.92200 |
| C | -3.45430 | 1.65160  | -0.21150 |
| H | -2.60070 | 2.10890  | 0.26810  |
| C | -3.62380 | 0.24300  | -0.12610 |
| C | 0.95560  | -0.36990 | 1.56110  |
| H | 0.70050  | 0.52590  | 2.12450  |
| C | 1.42760  | -1.32940 | 2.58110  |
| C | 2.01770  | -0.03440 | 0.51350  |
| C | 2.39070  | 1.31660  | 0.31540  |
| C | 1.83570  | 2.42180  | 1.04210  |
| H | 1.05710  | 2.26260  | 1.77550  |
| C | 2.24780  | 3.70660  | 0.81630  |
| H | 1.80260  | 4.51570  | 1.38410  |
| C | 3.24450  | 3.99890  | -0.15380 |
| H | 3.55800  | 5.02410  | -0.31250 |
| C | 3.79260  | 2.98430  | -0.88360 |
| H | 4.54800  | 3.18830  | -1.63500 |
| C | 3.38850  | 1.62810  | -0.68440 |
| C | 3.94130  | 0.60250  | -1.44990 |
| H | 4.68400  | 0.84800  | -2.20260 |
| C | 3.56230  | -0.72890 | -1.28040 |
| C | 4.12650  | -1.76210 | -2.08960 |
| H | 4.85860  | -1.48330 | -2.84000 |
| C | 3.75800  | -3.06710 | -1.92830 |
| H | 4.19200  | -3.84300 | -2.54810 |
| C | 2.80350  | -3.40990 | -0.93320 |
| H | 2.52460  | -4.44840 | -0.79630 |
| C | 2.24170  | -2.44940 | -0.13610 |
| H | 1.54600  | -2.76600 | 0.62940  |
| C | 2.58590  | -1.06460 | -0.27190 |

Cartesian coordinates and optimized **3a** in gas phase:  $E(\text{RB3LYP}) = -1147.353813$  hartrees;  
Dipole Moment = 5.707460 Debye; Basis Set = 6-311+G(d,p).

|   |          |          |          |
|---|----------|----------|----------|
| O | -2.89720 | -0.11380 | -1.97140 |
| N | -2.13640 | 0.99280  | -0.14230 |
| H | -2.28550 | 1.22080  | 0.82850  |
| N | -2.04040 | 4.26040  | -1.09760 |
| C | -2.95570 | 0.08440  | -0.76570 |
| C | -3.91620 | -0.65350 | 0.11910  |
| C | -3.69100 | -0.86840 | 1.48410  |
| H | -2.77790 | -0.52280 | 1.95620  |
| C | -4.61910 | -1.57460 | 2.24560  |
| H | -4.43120 | -1.74740 | 3.29900  |
| C | -5.78000 | -2.06640 | 1.65170  |
| H | -6.50340 | -2.61280 | 2.24630  |
| C | -6.00490 | -1.86260 | 0.29010  |
| H | -6.90450 | -2.24860 | -0.17560 |
| C | -5.07410 | -1.16770 | -0.47470 |
| H | -5.22570 | -1.01250 | -1.53560 |
| C | -1.16280 | 1.79220  | -0.88610 |
| H | -1.16530 | 1.37800  | -1.89750 |
| C | -1.64310 | 3.18160  | -1.01180 |
| C | 0.23550  | 1.70890  | -0.27650 |
| C | 0.71880  | 2.74670  | 0.52050  |
| H | 0.11430  | 3.63500  | 0.66440  |
| C | 1.96990  | 2.67640  | 1.12080  |
| H | 2.32150  | 3.50050  | 1.73170  |
| C | 2.78720  | 1.55530  | 0.94020  |
| C | 4.08590  | 1.45470  | 1.54530  |
| H | 4.43090  | 2.27890  | 2.16050  |
| C | 4.86930  | 0.36170  | 1.35680  |
| H | 5.84840  | 0.30110  | 1.82020  |
| C | 4.42900  | -0.73710 | 0.54390  |
| C | 5.22180  | -1.87450 | 0.33550  |
| H | 6.19960  | -1.92890 | 0.80210  |
| C | 4.76890  | -2.92480 | -0.45840 |
| H | 5.39690  | -3.79560 | -0.60810 |
| C | 3.51680  | -2.86380 | -1.06070 |
| H | 3.16860  | -3.68450 | -1.67870 |
| C | 2.68880  | -1.74530 | -0.88020 |
| C | 1.39400  | -1.64450 | -1.48470 |
| H | 1.04690  | -2.46530 | -2.10350 |
| C | 0.60120  | -0.55490 | -1.30080 |
| H | -0.37050 | -0.53460 | -1.77790 |
| C | 1.02720  | 0.55530  | -0.49030 |
| C | 2.31540  | 0.48180  | 0.12620  |
| C | 3.14270  | -0.66470 | -0.07010 |

Cartesian coordinates and optimized **3a** in gas phase:  $E(\text{RB3LYP}) = -1301.027717$  hartees;  
Dipole Moment = 5.369467 Debye; Basis Set = 6-311+G(d,p).

|   |          |          |          |
|---|----------|----------|----------|
| O | -2.11390 | 0.25260  | -1.79050 |
| N | -1.22220 | 1.23370  | 0.05110  |
| H | -1.30820 | 1.39800  | 1.04280  |
| N | -0.93410 | 4.53110  | -0.75350 |
| C | -2.11010 | 0.39310  | -0.57520 |
| C | -3.03040 | -0.34920 | 0.35120  |
| C | -2.50800 | -0.93510 | 1.48850  |
| H | -1.44710 | -0.85390 | 1.69690  |
| C | -3.32180 | -1.68080 | 2.36770  |
| H | -2.88010 | -2.14250 | 3.24300  |
| C | -4.66140 | -1.82080 | 2.10630  |
| H | -5.29580 | -2.38870 | 2.77880  |
| C | -5.24490 | -1.23270 | 0.95420  |
| C | -4.42320 | -0.49130 | 0.04310  |
| C | -0.22350 | 2.00190  | -0.69250 |
| H | -0.29300 | 1.64030  | -1.72160 |
| C | -0.61040 | 3.42490  | -0.73220 |
| C | 1.18810  | 1.79330  | -0.14670 |
| C | 1.77130  | 2.75320  | 0.68070  |
| H | 1.23450  | 3.67050  | 0.89470  |
| C | 3.03680  | 2.56880  | 1.22340  |
| H | 3.46700  | 3.33440  | 1.85980  |
| C | 3.76850  | 1.40750  | 0.95240  |
| C | 5.08010  | 1.18990  | 1.49590  |
| H | 5.50400  | 1.95600  | 2.13640  |
| C | 5.77970  | 0.05930  | 1.21960  |
| H | 6.76980  | -0.08970 | 1.63730  |
| C | 5.23440  | -0.96360 | 0.37210  |
| C | 5.93950  | -2.13810 | 0.07360  |
| H | 6.92890  | -2.28110 | 0.49460  |
| C | 5.38560  | -3.11310 | -0.75180 |
| H | 5.94690  | -4.01420 | -0.97150 |
| C | 4.11780  | -2.93840 | -1.29630 |
| H | 3.69090  | -3.70070 | -1.93910 |
| C | 3.37540  | -1.77890 | -1.02500 |
| C | 2.06800  | -1.56130 | -1.56860 |
| H | 1.64200  | -2.32350 | -2.21250 |
| C | 1.35890  | -0.43290 | -1.29720 |
| H | 0.37350  | -0.32350 | -1.73210 |
| C | 1.89040  | 0.60270  | -0.45090 |
| C | 3.19370  | 0.41190  | 0.10630  |
| C | 3.93290  | -0.77470 | -0.18200 |
| C | -5.03690 | 0.08600  | -1.10160 |
| C | -6.63280 | -1.36630 | 0.68670  |
| C | -6.38530 | -0.06170 | -1.32630 |
| C | -7.19350 | -0.79380 | -0.42790 |
| H | -8.25470 | -0.90130 | -0.62200 |
| H | -7.24420 | -1.92960 | 1.38380  |

|   |          |         |          |
|---|----------|---------|----------|
| H | -6.83330 | 0.38630 | -2.20610 |
| H | -4.42700 | 0.63010 | -1.80860 |

**Table S-1** TD-DFT calculated electronic transitions, oscillator strength (*f*), and MO composition for compounds **2a**.

| No. | Energy (cm <sup>-1</sup> ) | Wavelength (nm) | Osc. Strength | Symmetry  | Major contribs                                                                                     | Minor contribs                                                                |
|-----|----------------------------|-----------------|---------------|-----------|----------------------------------------------------------------------------------------------------|-------------------------------------------------------------------------------|
| 1   | 25162.88508                | 397.4107091     | 0.0941        | Singlet-A | HOMO->LUMO (98%)                                                                                   |                                                                               |
| 2   | 30674.07149                | 326.008238      | 0.002         | Singlet-A | H-1->LUMO (37%), HOMO->L+1 (30%), HOMO->L+2 (33%)                                                  |                                                                               |
| 3   | 30697.46157                | 325.7598345     | 0.002         | Singlet-A | H-1->LUMO (16%), HOMO->L+1 (70%), HOMO->L+2 (14%)                                                  |                                                                               |
| 4   | 35641.64022                | 280.5707015     | 0.0017        | Singlet-A | H-4->LUMO (62%), H-3->LUMO (15%), HOMO->L+4 (21%)                                                  |                                                                               |
| 5   | 36173.15959                | 276.4480658     | 0.0024        | Singlet-A | H-2->LUMO (93%)                                                                                    | H-5->LUMO (4%)                                                                |
| 6   | 36994.23199                | 270.3124098     | 0.0014        | Singlet-A | HOMO->L+3 (92%)                                                                                    | H-3->LUMO (3%)                                                                |
| 7   | 37268.4605                 | 268.3233991     | 0.0048        | Singlet-A | H-6->LUMO (13%), H-5->LUMO (13%), H-4->LUMO (12%), H-3->LUMO (58%)                                 | HOMO->L+3 (3%)                                                                |
| 8   | 38169.3818                 | 261.990096      | 0.0042        | Singlet-A | H-5->LUMO (33%), H-5->L+1 (21%), H-2->L+1 (20%)                                                    | H-6->L+1 (5%), H-4->LUMO (5%), H-3->LUMO (5%), H-2->LUMO (6%), HOMO->L+4 (3%) |
| 9   | 38429.09232                | 260.2195211     | 0.0082        | Singlet-A | H-6->LUMO (12%), H-5->LUMO (12%), H-5->L+1 (13%), H-4->LUMO (11%), H-2->L+1 (18%), HOMO->L+4 (18%) | H-6->L+1 (4%), H-3->LUMO (5%), HOMO->L+5 (3%)                                 |
| 10  | 38522.65264                | 259.5875236     | 0.0033        | Singlet-A | H-5->LUMO (19%), HOMO->L+4 (51%)                                                                   | H-6->LUMO (4%), H-4->LUMO (5%), H-3->LUMO (9%), H-2->L+1 (2%), HOMO->L+5 (2%) |
| 11  | 39130.79468                | 255.5532052     | 0.0006        | Singlet-A | H-6->LUMO (40%), H-5->LUMO (11%), HOMO->L+5 (28%)                                                  | H-5->L+1 (2%), H-3->LUMO (4%), H-2->L+1 (3%), HOMO->L+4 (2%), HOMO->L+6 (3%)  |
| 12  | 39534.07189                | 252.9463706     | 0.0318        | Singlet-A | H-6->LUMO (28%), HOMO->L+5 (52%)                                                                   | H-5->LUMO (6%)                                                                |
| 13  | 40526.94039                | 246.7494438     | 0.2297        | Singlet-A | H-3->L+1 (10%), H-3->L+1 (26%), H-2->L+3 (10%), H-1->L+1 (12%), HOMO->L+2 (10%)                    | H-4->L+1 (7%), H-3->L+3 (4%), H-2->L+1 (7%), H-1->LUMO (9%)                   |
| 14  | 40654.37599                | 245.9759806     | 0.5271        | Singlet-A | H-3->L+1 (13%), H-1->LUMO (15%), H-1->L+1 (34%), HOMO->L+2 (16%)                                   | H-5->L+1 (5%), H-4->L+1 (3%), H-3->L+3 (2%), H-2->L+1 (2%), H-2->L+3 (5%)     |
| 15  | 40839.88351                | 244.8586808     | 0.7151        | Singlet-A | H-1->LUMO (19%), H-1->L+1 (53%), HOMO->L+2 (23%)                                                   |                                                                               |
| 16  | 41353.65868                | 241.8165724     | 0.0438        | Singlet-A | HOMO->L+6 (77%), HOMO->L+7 (11%)                                                                   | H-7->LUMO (2%), HOMO->L+5 (5%)                                                |
| 17  | 42879.65966                | 233.2108062     | 0.0197        | Singlet-A | HOMO->L+7 (71%), HOMO->L+8 (14%)                                                                   | H-7->LUMO (3%), HOMO->L+5 (3%), HOMO->L+6 (4%), HOMO->L+9 (3%)                |
| 18  | 43680.56821                | 228.9347508     | 0.2373        | Singlet-A | H-5->L+1 (24%), H-3->L+1 (38%), H-2->L+1 (20%)                                                     | H-7->LUMO (4%), H-6->L+1 (2%), H-4->L+1 (4%), H-3->L+3 (4%)                   |
| 19  | 44011.25553                | 227.2146041     | 0.0032        | Singlet-A | H-8->LUMO (18%), H-4->L+2 (33%), H-1->L+4 (21%)                                                    | H-3->L+2 (7%), H-1->L+2 (3%), HOMO->L+8 (6%), HOMO->L+9 (2%)                  |
| 20  | 44070.94056                | 226.9068886     | 0.0221        | Singlet-A | H-4->L+1 (64%), HOMO->L+8 (11%)                                                                    | H-7->LUMO (2%), H-5->L+1 (7%), H-3->L+1 (3%), HOMO->L+9 (3%)                  |

**Table S-2** TD-DFT calculated electronic transitions, oscillator strength (*f*), and MO composition for compounds **2b**.

| No. | Energy (cm <sup>-1</sup> ) | Wavelength (nm) | Osc. Strength | Symmetry  | Major contribs                                    | Minor contribs                                                 |
|-----|----------------------------|-----------------|---------------|-----------|---------------------------------------------------|----------------------------------------------------------------|
| 1   | 25178.20961                | 397.1688279     | 0.0948        | Singlet-A | HOMO->LUMO (98%)                                  |                                                                |
| 2   | 28892.39276                | 346.111867      | 0             | Singlet-A | H-1->LUMO (100%)                                  |                                                                |
| 3   | 29055.31675                | 344.1710888     | 0.0003        | Singlet-A | HOMO->L+1 (99%)                                   |                                                                |
| 4   | 30688.58947                | 325.854012      | 0.0017        | Singlet-A | H-2->LUMO (53%), HOMO->L+2 (47%)                  |                                                                |
| 5   | 32888.86995                | 304.0542291     | 0.1203        | Singlet-A | H-1->L+1 (94%)                                    | H-3->L+3 (3%)                                                  |
| 6   | 34893.96426                | 286.582514      | 0.0002        | Singlet-A | H-3->LUMO (99%)                                   |                                                                |
| 7   | 35074.63245                | 285.1063376     | 0.0019        | Singlet-A | H-3->L+1 (57%), H-1->L+3 (41%)                    |                                                                |
| 8   | 35670.67618                | 280.3423168     | 0.0013        | Singlet-A | H-5->LUMO (21%), H-4->LUMO (56%), HOMO->L+4 (21%) |                                                                |
| 9   | 36813.5638                 | 271.6390093     | 0.0011        | Singlet-A | H-5->LUMO (64%), H-4->LUMO (28%)                  | H-5->L+1 (2%)                                                  |
| 10  | 37028.91384                | 270.0592311     | 0.0013        | Singlet-A | HOMO->L+3 (96%)                                   |                                                                |
| 11  | 37681.41637                | 265.3828057     | 0.0076        | Singlet-A | H-5->L+1 (50%), H-4->L+1 (30%)                    | H-6->LUMO (5%), H-5->LUMO (2%), H-5->L+5 (2%)                  |
| 12  | 38080.66081                | 262.6004851     | 0.0056        | Singlet-A | H-6->LUMO (89%)                                   | H-5->L+1 (2%), HOMO->L+6 (2%)                                  |
| 13  | 38538.78373                | 259.4788686     | 0.0012        | Singlet-A | H-4->LUMO (12%), HOMO->L+4 (73%)                  | H-5->LUMO (7%)                                                 |
| 14  | 39046.10646                | 256.1074818     | 0             | Singlet-A | H-2->L+1 (99%)                                    |                                                                |
| 15  | 39415.50839                | 253.7072439     | 0.0189        | Singlet-A | HOMO->L+5 (88%)                                   | HOMO->L+6 (8%)                                                 |
| 16  | 39538.10466                | 252.9205708     | 0.0141        | Singlet-A | HOMO->L+6 (75%)                                   | H-8->LUMO (4%), H-6->LUMO (2%), HOMO->L+5 (8%), HOMO->L+7 (4%) |
| 17  | 39787.32998                | 251.3362923     | 0.0006        | Singlet-A | H-1->L+2 (99%)                                    |                                                                |
| 18  | 40677.76607                | 245.8345422     | 1.2792        | Singlet-A | H-2->LUMO (43%), HOMO->L+2 (48%)                  |                                                                |
| 19  | 41445.60589                | 241.2801016     | 0.0155        | Singlet-A | HOMO->L+7 (79%), HOMO->L+8 (11%)                  | HOMO->L+6 (4%)                                                 |
| 20  | 41724.67372                | 239.6663439     | 0.0287        | Singlet-A | H-1->L+5 (83%)                                    | H-7->L+1 (5%), H-3->L+3 (4%), H-1->L+4 (4%)                    |



**Table S-3** TD-DFT calculated electronic transitions, oscillator strength (*f*), and MO composition for compounds **3a**.

| Wavelength (nm) | Osc. Strength | Symmetry  | Major contribs                                                                      | Minor contribs                                                                                                          |
|-----------------|---------------|-----------|-------------------------------------------------------------------------------------|-------------------------------------------------------------------------------------------------------------------------|
| 350.8225376     | 0.3312        | Singlet-A | HOMO->LUMO (90%)                                                                    | H-1->L+2 (6%)                                                                                                           |
| 337.0143059     | 0.0064        | Singlet-A | H-1->LUMO (40%), HOMO->L+1 (19%), HOMO->L+2 (39%)                                   |                                                                                                                         |
| 321.7109759     | 0.0117        | Singlet-A | HOMO->L+1 (78%), HOMO->L+2 (14%)                                                    | H-1->LUMO (7%)                                                                                                          |
| 288.3822785     | 0.0033        | Singlet-A | HOMO->L+4 (84%)                                                                     | H-3->LUMO (6%), H-2->LUMO (6%)                                                                                          |
| 278.3534485     | 0.0635        | Singlet-A | H-3->LUMO (30%), H-2->LUMO (27%), H-1->LUMO (13%), HOMO->L+2 (12%), HOMO->L+4 (14%) |                                                                                                                         |
| 274.7085126     | 0.2392        | Singlet-A | H-3->LUMO (12%), H-2->LUMO (16%), H-1->LUMO (35%), HOMO->L+2 (30%)                  |                                                                                                                         |
| 268.7945909     | 0.0004        | Singlet-A | HOMO->L+3 (99%)                                                                     |                                                                                                                         |
| 264.2346725     | 0.0234        | Singlet-A | H-6->L+1 (12%), H-2->L+1 (14%), H-1->L+1 (46%)                                      | H-5->LUMO (2%), H-5->L+1 (8%), H-3->LUMO (4%), H-3->L+1 (5%), H-2->LUMO (3%)                                            |
| 260.6352596     | 0.0094        | Singlet-A | H-5->LUMO (15%), H-3->LUMO (20%), H-2->LUMO (25%), H-1->L+1 (22%), HOMO->L+5 (11%)  | H-4->LUMO (4%)                                                                                                          |
| 257.8867088     | 0.003         | Singlet-A | H-5->LUMO (14%), H-4->LUMO (15%), H-3->LUMO (10%), HOMO->L+5 (27%)                  | H-6->LUMO (6%), H-5->L+1 (2%), H-2->LUMO (6%), H-2->L+1 (3%), H-1->L+1 (8%)                                             |
| 256.5207891     | 0.0056        | Singlet-A | H-3->LUMO (14%), H-2->LUMO (12%), H-2->L+1 (19%), H-1->L+1 (21%)                    | H-6->L+1 (9%), H-5->L+1 (9%), H-4->LUMO (3%), H-3->L+1 (6%)                                                             |
| 251.6679042     | 0.0138        | Singlet-A | H-4->LUMO (60%), HOMO->L+5 (21%)                                                    | H-7->LUMO (7%), H-4->L+1 (2%)                                                                                           |
| 248.0279127     | 0.0596        | Singlet-A | H-5->LUMO (39%), HOMO->L+5 (16%)                                                    | H-7->LUMO (7%), H-5->L+1 (6%), H-4->L+1 (8%), H-4->L+3 (3%), H-3->L+1 (3%), H-3->L+3 (3%), H-2->L+1 (3%), H-1->L+2 (3%) |
| 244.5399361     | 0.006         | Singlet-A | H-5->LUMO (15%), H-5->L+1 (14%), H-4->LUMO (11%), H-4->L+1 (27%)                    | H-4->L+3 (5%), H-3->L+3 (6%), H-2->L+1 (3%), H-2->L+3 (3%), HOMO->L+5 (3%), HOMO->L+6 (4%)                              |
| 243.0109624     | 0.0021        | Singlet-A | HOMO->L+6 (68%)                                                                     | H-7->LUMO (4%), H-5->LUMO (4%), H-1->L+4 (4%), HOMO->L+5 (3%), HOMO->L+7 (7%)                                           |
| 241.4069453     | 0.0008        | Singlet-A | H-3->L+2 (17%), H-2->L+2 (15%), H-1->L+4 (44%)                                      | H-3->L+1 (7%), H-2->L+1 (4%), HOMO->L+6 (8%)                                                                            |
| 238.7065711     | 0.0087        | Singlet-A | H-6->LUMO (85%)                                                                     | H-7->LUMO (7%), H-4->LUMO (2%)                                                                                          |
| 234.7029739     | 0.5305        | Singlet-A | H-3->L+1 (15%), H-1->L+2 (45%)                                                      | H-7->LUMO (8%), H-5->L+1 (6%), H-4->L+1 (5%), HOMO->LUMO (3%), HOMO->L+7 (4%)                                           |
| 232.9303994     | 0.0114        | Singlet-A | HOMO->L+7 (74%)                                                                     | H-3->L+1 (7%), HOMO->L+6 (4%), HOMO->L+8 (5%)                                                                           |
| 232.4325916     | 0.2148        | Singlet-A | H-3->L+1 (38%), H-2->L+1 (16%), H-1->L+2 (25%)                                      | H-1->L+4 (3%), HOMO->L+7 (5%)                                                                                           |

**Table S-4** TD-DFT calculated electronic transitions, oscillator strength (*f*), and MO composition for compounds **3b**.

| No. | Energy (cm <sup>-1</sup> ) | Wavelength (nm) | Osc. Strength | Symmetry  | Major contribs                                                     | Minor contribs                                                |
|-----|----------------------------|-----------------|---------------|-----------|--------------------------------------------------------------------|---------------------------------------------------------------|
| 1   | 28333.45054                | 352.9397165     | 0.3071        | Singlet-A | HOMO->LUMO (83%)                                                   | H-2->L+2 (5%), HOMO->L+1 (9%)                                 |
| 2   | 29364.2271                 | 340.5504244     | 0.0466        | Singlet-A | H-2->LUMO (10%), HOMO->L+1 (69%), HOMO->L+2 (10%)                  | HOMO->LUMO (8%)                                               |
| 3   | 29931.23486                | 334.0991458     | 0.0042        | Singlet-A | H-2->LUMO (35%), HOMO->L+1 (21%), HOMO->L+2 (42%)                  |                                                               |
| 4   | 31024.11611                | 322.3298921     | 0.0135        | Singlet-A | H-1->LUMO (98%)                                                    |                                                               |
| 5   | 32875.15853                | 304.1810427     | 0.1141        | Singlet-A | H-1->L+1 (93%)                                                     | H-3->L+3 (3%)                                                 |
| 6   | 34633.44718                | 288.7382231     | 0.0049        | Singlet-A | H-4->LUMO (12%), HOMO->L+4 (84%)                                   |                                                               |
| 7   | 35021.39986                | 285.5396997     | 0.0015        | Singlet-A | H-3->L+1 (51%), H-1->L+3 (39%)                                     | H-3->LUMO (5%)                                                |
| 8   | 35903.77041                | 278.5222802     | 0.0953        | Singlet-A | H-4->LUMO (44%), H-2->LUMO (19%), HOMO->L+2 (16%), HOMO->L+4 (13%) |                                                               |
| 9   | 36269.94612                | 275.7103627     | 0.1375        | Singlet-A | H-4->LUMO (38%), H-2->LUMO (23%), H-2->L+1 (14%), HOMO->L+2 (17%)  |                                                               |
| 10  | 36722.42315                | 272.3131847     | 0.095         | Singlet-A | H-2->L+1 (72%)                                                     | H-5->L+1 (5%), H-4->LUMO (3%), H-2->LUMO (5%), HOMO->L+2 (8%) |
| 11  | 37076.50055                | 269.7126172     | 0.0029        | Singlet-A | H-3->LUMO (91%)                                                    | H-3->L+1 (4%)                                                 |
| 12  | 37410.41408                | 267.3052476     | 0.002         | Singlet-A | HOMO->L+3 (95%)                                                    |                                                               |
| 13  | 37873.37632                | 264.0377218     | 0.0018        | Singlet-A | H-5->LUMO (19%), H-5->L+1 (48%)                                    | H-6->L+1 (6%), H-5->L+5 (3%), H-4->L+1 (5%), H-2->L+1 (9%)    |
| 14  | 38137.11962                | 262.211727      | 0.0006        | Singlet-A | H-1->L+2 (98%)                                                     |                                                               |
| 15  | 38607.34085                | 259.0180981     | 0.0032        | Singlet-A | H-6->LUMO (15%), H-5->LUMO (35%), H-5->L+1 (10%), HOMO->L+6 (33%)  |                                                               |
| 16  | 39591.33726                | 252.5805061     | 0.013         | Singlet-A | H-5->LUMO (29%), HOMO->L+5 (29%), HOMO->L+6 (22%)                  | H-7->LUMO (4%), H-6->LUMO (7%), H-5->L+1 (3%)                 |
| 17  | 39888.14929                | 250.7010272     | 0.0104        | Singlet-A | HOMO->L+5 (66%)                                                    | H-6->LUMO (3%), H-5->LUMO (9%), H-5->L+1 (4%), HOMO->L+6 (9%) |
| 18  | 40618.08104                | 246.1957764     | 0.0373        | Singlet-A | H-7->LUMO (15%), H-6->LUMO (62%), HOMO->L+6 (11%)                  | H-4->L+1 (4%), H-2->L+2 (3%)                                  |
| 19  | 41222.19031                | 242.5877889     | 0.0043        | Singlet-A | H-4->L+1 (42%), H-4->L+2 (18%), H-2->L+4 (23%)                     | H-5->L+1 (4%), HOMO->L+6 (3%), HOMO->L+7 (3%)                 |
| 20  | 41464.15664                | 241.1721547     | 0.002         | Singlet-A | HOMO->L+7 (80%)                                                    | H-7->LUMO (3%), H-4->L+1 (4%), HOMO->L+8 (8%)                 |

## 8. Crystallographic Data and Detailed Refinements for 2-3

**Table S-5** Crystal data and structure refinement of 2a

|                                                      |                                                                              |
|------------------------------------------------------|------------------------------------------------------------------------------|
| Empirical formula                                    | C <sub>23</sub> H <sub>16</sub> N <sub>2</sub> O                             |
| Formula weight                                       | 336.38                                                                       |
| Temperature/K                                        | 100(2)                                                                       |
| Crystal system                                       | triclinic                                                                    |
| Space group                                          | <i>P</i> -1                                                                  |
| <i>a</i> /Å                                          | 9.8120(2)                                                                    |
| <i>b</i> /Å                                          | 12.8630(3)                                                                   |
| <i>c</i> /Å                                          | 15.4670(3)                                                                   |
| $\alpha$ /°                                          | 110.229(2)                                                                   |
| $\beta$ /°                                           | 96.599(2)                                                                    |
| $\gamma$ /°                                          | 106.447(2)                                                                   |
| Volume/Å <sup>3</sup>                                | 1706.94(8)                                                                   |
| <i>Z</i>                                             | 4                                                                            |
| $\rho_{\text{calc}}$ /cm <sup>3</sup>                | 1.309                                                                        |
| $\mu$ /mm <sup>-1</sup>                              | 0.639                                                                        |
| <i>F</i> (000)                                       | 704.0                                                                        |
| Crystal size/mm <sup>3</sup>                         | 0.24 × 0.1 × 0.06                                                            |
| Radiation                                            | Cu <i>K</i> α ( $\lambda$ = 1.54184)                                         |
| 2 $\theta$ range for data collection/°               | 6.268 to 154.68                                                              |
| Index ranges                                         | -12 ≤ <i>h</i> ≤ 11, -15 ≤ <i>k</i> ≤ 16, -19 ≤ <i>l</i> ≤ 15                |
| Reflections collected                                | 42515                                                                        |
| Independent reflections                              | 7152 [ <i>R</i> <sub>int</sub> = 0.0533, <i>R</i> <sub>sigma</sub> = 0.0330] |
| Data/restraints/parameters                           | 7152/0/476                                                                   |
| Goodness-of-fit on <i>F</i> <sup>2</sup>             | 1.057                                                                        |
| Final <i>R</i> indexes [ <i>I</i> >= 2σ( <i>I</i> )] | <i>R</i> <sub>1</sub> = 0.0430, <i>wR</i> <sub>2</sub> = 0.1102              |
| Final <i>R</i> indexes [all data]                    | <i>R</i> <sub>1</sub> = 0.0496, <i>wR</i> <sub>2</sub> = 0.1145              |
| Largest diff. peak/hole / e Å <sup>-3</sup>          | 0.25/-0.23                                                                   |

**Table S-6** Crystal data and structure refinement of 2b

|                   |                                                                               |
|-------------------|-------------------------------------------------------------------------------|
| Empirical formula | C <sub>57</sub> H <sub>39</sub> Cl <sub>9</sub> N <sub>4</sub> O <sub>2</sub> |
| Formula weight    | 1130.97                                                                       |
| Temperature/K     | 100(2)                                                                        |
| Crystal system    | triclinic                                                                     |
| Space group       | <i>P</i> -1                                                                   |
| <i>a</i> /Å       | 10.3742(2)                                                                    |
| <i>b</i> /Å       | 11.1000(2)                                                                    |
| <i>c</i> /Å       | 11.2768(2)                                                                    |

|                                               |                                                               |
|-----------------------------------------------|---------------------------------------------------------------|
| $\alpha/^\circ$                               | 92.4379(16)                                                   |
| $\beta/^\circ$                                | 94.2137(15)                                                   |
| $\gamma/^\circ$                               | 91.8446(16)                                                   |
| Volume/ $\text{\AA}^3$                        | 1293.07(4)                                                    |
| Z                                             | 1                                                             |
| $\rho_{\text{calc}}/\text{g/cm}^3$            | 1.452                                                         |
| $\mu/\text{mm}^{-1}$                          | 4.842                                                         |
| $F(000)$                                      | 578.0                                                         |
| Crystal size/ $\text{mm}^3$                   | $0.208 \times 0.137 \times 0.07$                              |
| Radiation                                     | Cu $K\alpha$ ( $\lambda = 1.54184$ )                          |
| $2\theta$ range for data collection/ $^\circ$ | 7.87 to 154.746                                               |
| Index ranges                                  | $-12 \leq h \leq 13, -14 \leq k \leq 13, -13 \leq l \leq 14$  |
| Reflections collected                         | 32585                                                         |
| Independent reflections                       | 5420 [ $R_{\text{int}} = 0.0665, R_{\text{sigma}} = 0.0381$ ] |
| Data/restraints/parameters                    | 5420/42/405                                                   |
| Goodness-of-fit on $F^2$                      | 1.066                                                         |
| Final $R$ indexes [ $I > 2\sigma(I)$ ]        | $R_1 = 0.0437, wR_2 = 0.1124$                                 |
| Final $R$ indexes [all data]                  | $R_1 = 0.0485, wR_2 = 0.1165$                                 |
| Largest diff. peak/hole / $e \text{\AA}^{-3}$ | 0.97/-0.57                                                    |

**Table S-7** Crystal data and structure refinement of **3a**

|                                               |                                                              |
|-----------------------------------------------|--------------------------------------------------------------|
| Empirical formula                             | $\text{C}_{25}\text{H}_{16}\text{N}_2\text{O}$               |
| Formula weight                                | 360.40                                                       |
| Temperature/K                                 | 100(2)                                                       |
| Crystal system                                | monoclinic                                                   |
| Space group                                   | $P2_1/c$                                                     |
| $a/\text{\AA}$                                | 10.04500(10)                                                 |
| $b/\text{\AA}$                                | 20.4122(2)                                                   |
| $c/\text{\AA}$                                | 17.8760(2)                                                   |
| $\beta/^\circ$                                | 103.3480(10)                                                 |
| Volume/ $\text{\AA}^3$                        | 3566.29(7)                                                   |
| Z                                             | 8                                                            |
| $\rho_{\text{calc}}/\text{g/cm}^3$            | 1.342                                                        |
| $\mu/\text{mm}^{-1}$                          | 0.652                                                        |
| $F(000)$                                      | 1504.0                                                       |
| Crystal size/ $\text{mm}^3$                   | $0.194 \times 0.115 \times 0.059$                            |
| Radiation                                     | Cu $K\alpha$ ( $\lambda = 1.54184$ )                         |
| $2\theta$ range for data collection/ $^\circ$ | 6.676 to 159.572                                             |
| Index ranges                                  | $-12 \leq h \leq 12, -26 \leq k \leq 25, -19 \leq l \leq 22$ |
| Reflections collected                         | 88647                                                        |

|                                               |                                                                  |
|-----------------------------------------------|------------------------------------------------------------------|
| Independent reflections                       | 7713 [ $R_{\text{int}} = 0.0699$ , $R_{\text{sigma}} = 0.0315$ ] |
| Data/restraints/parameters                    | 7713/0/513                                                       |
| Goodness-of-fit on $F^2$                      | 1.043                                                            |
| Final $R$ indexes [ $I \geq 2\sigma(I)$ ]     | $R_1 = 0.0663$ , $wR_2 = 0.1790$                                 |
| Final $R$ indexes [all data]                  | $R_1 = 0.0770$ , $wR_2 = 0.1918$                                 |
| Largest diff. peak/hole / e $\text{\AA}^{-3}$ | 0.59/-0.23                                                       |

**Table S-8** Crystal data and structure refinement of **3b**

|                                               |                                                                  |
|-----------------------------------------------|------------------------------------------------------------------|
| Empirical formula                             | $\text{C}_{30}\text{H}_{19}\text{Cl}_3\text{N}_2\text{O}$        |
| Formula weight                                | 529.82                                                           |
| Temperature/K                                 | 100(2)                                                           |
| Crystal system                                | monoclinic                                                       |
| Space group                                   | $P2_1$                                                           |
| $a/\text{\AA}$                                | 4.8515(2)                                                        |
| $b/\text{\AA}$                                | 21.8040(12)                                                      |
| $c/\text{\AA}$                                | 11.5794(5)                                                       |
| $\beta/^\circ$                                | 91.942(4)                                                        |
| Volume/ $\text{\AA}^3$                        | 1224.19(10)                                                      |
| $Z$                                           | 2                                                                |
| $\rho_{\text{calc}}/\text{g/cm}^3$            | 1.437                                                            |
| $\mu/\text{mm}^{-1}$                          | 3.607                                                            |
| $F(000)$                                      | 544.0                                                            |
| Crystal size/ $\text{mm}^3$                   | $0.2 \times 0.05 \times 0.04$                                    |
| Radiation                                     | Cu $K\alpha$ ( $\lambda = 1.54184$ )                             |
| $2\theta$ range for data collection/ $^\circ$ | 7.64 to 149.936                                                  |
| Index ranges                                  | $-6 \leq h \leq 6$ , $-27 \leq k \leq 23$ , $-14 \leq l \leq 14$ |
| Reflections collected                         | 23474                                                            |
| Independent reflections                       | 4748 [ $R_{\text{int}} = 0.0808$ , $R_{\text{sigma}} = 0.0523$ ] |
| Data/restraints/parameters                    | 4748/17/367                                                      |
| Goodness-of-fit on $F^2$                      | 1.060                                                            |
| Final $R$ indexes [ $I \geq 2\sigma(I)$ ]     | $R_1 = 0.0694$ , $wR_2 = 0.1904$                                 |
| Final $R$ indexes [all data]                  | $R_1 = 0.0840$ , $wR_2 = 0.2025$                                 |
| Largest diff. peak/hole / e $\text{\AA}^{-3}$ | 0.37/-0.51                                                       |
| Flack parameter                               | 0.03(4)                                                          |
